# Supplementary material
Source: PubMed Central journal article supplement (PMC3398805)
Supplement: NIHMS324025-supplement-1.pdf [file NIHMS324025-supplement-1.pdf]

## SUPPLEMENTAL MATERIAL

**Supplemental Table 1. Description of myocardial gene expression datasets.** Sample accession numbers and clinical characteristics, as listed in Gene Expression Omnibus (GEO), are given.

| manuscript ID | GEO accession | Species | comparison                                                                             | microarray | normalization      |
|---------------|---------------|---------|----------------------------------------------------------------------------------------|------------|--------------------|
| 1             | GSE1145       | human   | non-failing (n=14) vs. ICM+NICM (n=80)                                                 | Affymetrix | RMA                |
| 2             | GSE3586       | human   | non-failing (n=15) vs. NICM (n=13)                                                     | cDNA, 37K  | VSN                |
| 3             | GSE5406       | human   | non-failing (n=16) vs. ICM+NICM (n=194)                                                | Affymetrix | RMA                |
| 4             | GSE9800       | human   | non-failing (n=11) vs. ICM+NICM (n=19)                                                 | Agilent    | Lowess             |
| 5             | GSE10161      | human   | non-failing (n=7) vs. aortic stenosis (n=20)                                           | Affymetrix | MAS5.0             |
| 6             | GSE21610      | human   | non-failing (n=8) vs. heart failure, pre-LVAD implantation (n=30)                      | Affymetrix | MAS5.0             |
| 7             | GSE3530       | mouse   | wild-type (n=3) vs. MKK7D transgenic (n=6)                                             | Affymetrix | MAS5.0             |
| 8             | GSE3530       | mouse   | wild-type (n=6) vs. MKK3bE transgenic (n=5)                                            | Affymetrix | MAS5.0             |
| 9             | GSE8000       | mouse   | wild-type (n=8) vs. LMNA TG (n=6)                                                      | Affymetrix | MAS5.0             |
| 10            | GSE11887      | mouse   | wild-type (n=6) vs. AC5-beta1-adrenergic receptor overexpressing transgenic mice (n=6) | Affymetrix | RMA                |
| 11            | GSE12413      | mouse   | FVB-non-failing (n=10) vs. FVB-ISO-heart failure (n=12)                                | Affymetrix | MAS5.0             |
| 12            | GSE6970       | mouse   | non-failing (n=8) vs. transverse aortic constriction (n=8)                             | Affymetrix | MAS5.0             |
| 13            | GSE16909      | mouse   | wild-type (n=11), EP4-knock-out (n=6)                                                  | Illumina   | quantile           |
| 14            | GSE17363      | mouse   | control (n=4) vs. chagasic hearts (n=4)                                                | Operon 30k | in-house algorithm |
| 15            | GSE14327      | dog     | non-failing (n=11) vs. heart failure (n=10)                                            | Agilent    | quantile           |
| 16            | GSE5247       | dog     | non-failing (n=4) vs. heart failure (n=8)                                              | Affymetrix | MAS5.0             |
| 17            | GSE9794       | dog     | non-failing (n=3) vs. heart failure (n=12)                                             | Affymetrix | MAS5.0             |
| 18            | GSE11015      | dog     | non-failing (n=3) vs. heart failure (n=3)                                              | Affymetrix | MAS5.0             |
| 19            | GSE20665      | dog     | non-failing atrium (n=11) vs. heart failure atrium (n=7)                               | Agilent    | quantile           |
| 20            | GSE14338      | dog     | biventricular pacing HF (n=5) vs. dyssynchronous HF (n=5)                              | Agilent    | quantile           |
| 21            | GSE21021      | rat     | control (n=6) vs. coronary ligation (n=6)                                              | Illumina   | quantile           |
| 22            | GSE17050      | rat     | control (n=5) vs. chronic aortic regurgitation (n=5)                                   | Illumina   | quantile           |
| 23            | GSE4963       | rat     | non-failing (n=4) vs. heart failure (n=10)                                             | Operon     | Lowess             |
| 24            | GSE4963       | rat     | non-failing (n=4) vs. heart failure+DITPA (n=6)                                        | Operon     | Lowess             |

| manuscript ID<br>(continued) | GEO accession       | Species   | comparison                                                   | microarray | normalization |
|------------------------------|---------------------|-----------|--------------------------------------------------------------|------------|---------------|
| 25                           | GSE6104             | rat       | RV PE 2h (n=5) vs. RV PE 18h (n=5)                           | Affymetrix | RMA           |
| 26                           | GSE6104             | rat       | RV 6h vehicle control (n=5) vs. RV PE 6h (n=5)               | Affymetrix | RMA           |
| 27                           | GSE6104             | rat       | RV 18h vehicle control (n=5) vs. RV PE 18h (n=5)             | Affymetrix | RMA           |
| 28                           | GSE11851            | rat       | vehicle ctrl. RVOT 6wks. (n=5) vs. RVOT PE 6wks. (n=5)       | Affymetrix | RMA           |
| 29                           | GSE2051, 2061, 2062 | human     | adult (n=7) vs. fetal (n=11)                                 | Agilent    | Lowess        |
| 30                           | GSE1145             | human     | OXPHOS high (n=10) vs. OXPHOS low (n=10)                     | Affymetrix | RMA           |
| 31                           | GSE5406             | human     | OXPHOS high (n=10) vs. OXPHOS low (n=10)                     | Affymetrix | RMA           |
| 32                           | GSE2240             | human     | ventricle (n = 5) vs. atria (n=30)                           | Affymetrix | RMA           |
| 33                           | GSE14327, 20665     | dog       | ventricle (n = 58) vs. atria (n=18)                          | Agilent    | quantile      |
| 34                           | mousedevlopment.org | mouse     | ventricle (n = 3) vs. atria (n=3)                            | cDNA       | dye-bias      |
| 35                           | GSE12758            | rat       | ventricle (n=6) vs. atria (n=6)                              | Affymetrix | RMA           |
| 36                           | GSE13614            | mouse     | working (n=12) vs. AV-node myocardium (n=12)                 | Affymetrix | RMA           |
| 37                           | GSE11851            | rat       | RV apex PE 6wks. (n=5) vs. RVOT PE 6wks. (n=5)               | Affymetrix | RMA           |
| 38                           | GSE6880             | rat       | control (n=3) vs. diabetes (n=3)                             | Affymetrix | MAS5.0        |
| 39                           | GSE19290            | rat       | control (n=6) vs. colchicine (n=6)                           | Affymetrix | RMA           |
| 40                           | GSE21023            | rat       | control (n=7) vs. octaonate fatty acid (n=7)                 | Illumina   | quantile      |
| 41                           | GSE21640            | rat       | control (n=6) vs. DEHP (n=6)                                 | Affymetrix | RMA           |
| 42                           | GSE4386             | human     | pre- and post-CABG paired samples (n=20)                     | Affymetrix | MAS5.0        |
| 43                           | GSE14970            | human     | acyanotic (n=5) vs. cyanotic (n=7)                           | Affymetrix | MAS5.0        |
| 44                           | GSE2240             | human     | sinus rhythm (n=20) vs. permanent atrial fibrillation (n=10) | Affymetrix | RMA           |
| 45                           | GSE9377             | human     | acute rejection, stage 0-1A (n=14) vs. stage 3A+3B (n=8)     | Agilent    | dye-bias      |
| 46                           | GSE4989             | zebrafish | control (n=5) vs. hypoxia (n=5)                              | Affymetrix | RMA           |
| 47                           | GSE21096            | pig       | control (n=5) vs. ischemia/reperfusion (n=5)                 | Affymetrix | RMA           |
| 48                           | GSE21096            | pig       | control (n=5) vs. repeated coronary stenosis (n=5)           | Affymetrix | RMA           |

**ICM** = ischemic cardiomyopathy, **NICM** = non-ischemic cardiomyopathy, **HF**= heart failure, **FVB** = mouse strain, **MKK7D** and **MKK3bE** are MAPK genes; **LMNA** = lamin A, **DITPA** = Thyroid Hormone Analog, **RVOT** = right ventricular outflow tract, **PE** = experimental pulmonary embolism with 2.0 x 10 million microspheres; **RV** = right ventricle, **RMA** = robust multi-array average, **VSN** = variance-stabilizing normalization, **DEHP** = Di-(2-ethyl hexyl) phthalate

**Supplemental Table 2.** Phenotypic information for dataset #3 (GSE5406)

| GEO-ID       | sex    | race | age | CABG | duration | DM  | inotropes | ACE-I | BB  | IABP | EF   |
|--------------|--------|------|-----|------|----------|-----|-----------|-------|-----|------|------|
| Idiopathic1  | Female | N/A  | 51  | no   | 60       | no  | yes       | no    | no  | no   | 7.5  |
| Idiopathic10 | Male   | C    | 43  | no   | 9        | no  | yes       | yes   | no  | no   | 7.5  |
| Idiopathic11 | Male   | AA   | 39  | no   | 30       | no  | yes       | no    | no  | no   | 5    |
| Idiopathic12 | Male   | C    | 67  | no   | N/A      | no  | yes       | yes   | no  | no   | 12.5 |
| Idiopathic13 | Male   | AA   | 46  | no   | 12       | no  | yes       | yes   | yes | no   | 10   |
| Idiopathic14 | Male   | C    | 66  | no   | 60       | yes | yes       | no    | no  | no   | 12.5 |
| Idiopathic15 | Female | C    | 64  | no   | 33       | no  | yes       | yes   | no  | no   | 12.5 |
| Idiopathic16 | Male   | C    | N/A | no   | 26       | no  | no        | no    | no  | no   | N/A  |
| Idiopathic17 | Male   | C    | 58  | no   | 15       | yes | yes       | no    | no  | no   | 17.5 |
| Idiopathic18 | Male   | AA   | 43  | no   | 36       | no  | yes       | no    | no  | no   | 7.5  |
| Idiopathic19 | Male   | C    | 57  | yes  | 129      | yes | yes       | no    | no  | no   | N/A  |
| Idiopathic2  | Male   | N/A  | 46  | no   | 83       | no  | yes       | yes   | no  | no   | 5    |
| Idiopathic20 | Male   | AA   | 41  | no   | 4        | no  | yes       | yes   | no  | no   | 7.5  |
| Idiopathic21 | Female | C    | 31  | no   | 35       | no  | yes       | yes   | no  | no   | 12.5 |
| Idiopathic22 | Female | C    | 59  | no   | 24       | no  | yes       | yes   | no  | no   | N/A  |
| Idiopathic23 | Female | C    | 64  | no   | 66       | no  | yes       | yes   | no  | no   | 7.5  |
| Idiopathic24 | Female | C    | 60  | no   | 84       | yes | yes       | no    | no  | yes  | 7.5  |
| Idiopathic25 | Female | C    | 61  | no   | 69       | yes | yes       | yes   | yes | no   | 10   |
| Idiopathic26 | Male   | AA   | 54  | no   | 183      | yes | yes       | no    | no  | no   | 5    |
| Idiopathic27 | Male   | C    | 59  | no   | 48       | no  | yes       | no    | no  | yes  | 7.5  |
| Idiopathic28 | Male   | C    | 54  | no   | 101      | no  | yes       | yes   | no  | no   | 7.5  |
| Idiopathic29 | Male   | AA   | 54  | no   | 6        | no  | yes       | yes   | yes | no   | 7.5  |
| Idiopathic3  | Female | AA   | 56  | no   | 72       | no  | yes       | no    | no  | no   | 7.5  |
| Idiopathic30 | Female | H    | 53  | no   | N/A      | no  | yes       | yes   | no  | no   | 7.5  |
| Idiopathic31 | Female | C    | 51  | no   | 67       | no  | yes       | yes   | no  | yes  | N/A  |
| Idiopathic32 | Male   | C    | 38  | no   | 58       | no  | yes       | yes   | no  | yes  | 10   |
| Idiopathic33 | Male   | C    | 28  | no   | 25       | no  | yes       | yes   | no  | no   | 7.5  |
| Idiopathic34 | Female | AA   | 51  | no   | 28       | no  | yes       | yes   | no  | no   | 12.5 |
| Idiopathic35 | Male   | C    | 63  | no   | 21       | yes | no        | yes   | yes | no   | 22.5 |
| Idiopathic36 | Male   | C    | 25  | no   | 17       | no  | yes       | yes   | no  | no   | 7.5  |
| Idiopathic37 | Male   | AA   | 54  | no   | 96       | no  | yes       | yes   | no  | no   | N/A  |
| Idiopathic38 | Female | AA   | 42  | no   | 66       | no  | yes       | yes   | no  | no   | 7.5  |
| Idiopathic39 | Male   | C    | 53  | no   | 96       | no  | no        | yes   | yes | no   | 7.5  |
| Idiopathic4  | Female | AA   | 52  | no   | 144      | no  | yes       | yes   | no  | no   | 22.5 |
| Idiopathic4  | Male   | C    | 48  | no   | 85       | no  | yes       | yes   | no  | no   | 7.5  |
| Idiopathic41 | Male   | C    | 19  | no   | 24       | no  | yes       | yes   | yes | no   | 20   |
| Idiopathic42 | Male   | C    | 16  | no   | 30       | no  | yes       | yes   | no  | no   | 7.5  |
| Idiopathic43 | Male   | AA   | 51  | no   | 6        | no  | yes       | yes   | yes | no   | 15   |
| Idiopathic44 | Male   | N/A  | 34  | no   | 96       | no  | yes       | yes   | yes | no   | 7.5  |
| Idiopathic45 | Male   | H    | 54  | no   | 11       | yes | yes       | no    | no  | no   | 12.5 |
| Idiopathic46 | Female | C    | 37  | no   | 108      | no  | yes       | yes   | yes | no   | 30   |
| Idiopathic47 | Female | C    | 65  | no   | 22       | no  | yes       | yes   | yes | no   | 10   |
| Idiopathic48 | Female | AA   | 54  | no   | 120      | no  | no        | yes   | no  | no   | 17.5 |
| Idiopathic49 | Male   | AA   | 37  | no   | 24       | no  | yes       | no    | no  | yes  | 10   |
| Idiopathic5  | Male   | C    | 58  | no   | 54       | no  | yes       | yes   | no  | no   | 25   |
| Idiopathic50 | Male   | C    | 55  | no   | 32       | no  | yes       | yes   | yes | no   | 7.5  |
| Idiopathic51 | Male   | C    | 18  | no   | 4        | no  | yes       | yes   | no  | no   | 7.5  |

| <b>GEO-ID</b>      | <b>sex</b> | <b>race</b> | <b>age</b> | <b>CABG</b> | <b>duration</b> | <b>DM</b> | <b>inotropes</b> | <b>ACE-I</b> | <b>BB</b> | <b>IABP</b> | <b>EF</b> |
|--------------------|------------|-------------|------------|-------------|-----------------|-----------|------------------|--------------|-----------|-------------|-----------|
| <b>(continued)</b> |            |             |            |             |                 |           |                  |              |           |             |           |
| Idiopathic52       | Male       | C           | 44         | no          | 33              | no        | yes              | yes          | no        | no          | 12.5      |
| Idiopathic53       | Male       | AA          | 49         | no          | 12              | no        | yes              | no           | no        | no          | 5         |
| Idiopathic54       | Male       | C           | 63         | no          | 56              | no        | yes              | no           | no        | no          | 5         |
| Idiopathic55       | Male       | C           | 61         | no          | 120             | no        | yes              | yes          | no        | no          | 12.5      |
| Idiopathic56       | Male       | C           | 44         | no          | 43              | no        | yes              | yes          | no        | no          | 17.5      |
| Idiopathic57       | Male       | C           | 66         | no          | 78              | no        | yes              | yes          | yes       | no          | 12.5      |
| Idiopathic58       | Male       | C           | 51         | no          | 37              | no        | yes              | yes          | no        | no          | 5         |
| Idiopathic59       | Male       | C           | 67         | no          | 220             | no        | yes              | yes          | yes       | no          | 12.5      |
| Idiopathic6        | Female     | C           | 69         | no          | 91              | yes       | yes              | yes          | no        | yes         | 7.5       |
| Idiopathic60       | Male       | AA          | 46         | no          | 8               | no        | no               | no           | no        | no          | 20        |
| Idiopathic61       | Female     | AA          | 28         | no          | 49              | no        | yes              | yes          | yes       | no          | 7.5       |
| Idiopathic62       | Male       | C           | 66         | no          | 120             | no        | yes              | yes          | no        | no          | 20        |
| Idiopathic63       | Male       | C           | 64         | no          | 131             | no        | yes              | yes          | no        | no          | 12.5      |
| Idiopathic64       | Male       | C           | 47         | no          | 34              | no        | yes              | yes          | no        | no          | 17.5      |
| Idiopathic65       | Female     | AA          | 47         | no          | 88              | no        | no               | yes          | yes       | no          | 17.5      |
| Idiopathic66       | Male       | C           | 57         | no          | 60              | no        | yes              | yes          | no        | yes         | 7.5       |
| Idiopathic67       | Male       | AA          | 36         | no          | 4               | no        | yes              | yes          | no        | yes         | 7.5       |
| Idiopathic68       | Female     | AA          | 39         | no          | 96              | yes       | yes              | no           | no        | no          | 5         |
| Idiopathic69       | Male       | C           | 49         | no          | 126             | no        | yes              | no           | no        | no          | 12.5      |
| Idiopathic7        | Male       | C           | 29         | no          | 55              | yes       | yes              | yes          | no        | no          | 12.5      |
| Idiopathic70       | Female     | C           | 58         | no          | 72              | no        | yes              | yes          | no        | no          | 12.5      |
| Idiopathic71       | Male       | AA          | 56         | no          | 108             | no        | yes              | yes          | yes       | no          | 12.5      |
| Idiopathic72       | Male       | C           | 57         | no          | 72              | no        | yes              | no           | no        | no          | 12.5      |
| Idiopathic73       | Male       | AA          | 44         | no          | 12              | no        | yes              | yes          | no        | no          | 7.5       |
| Idiopathic74       | Male       | AA          | 57         | no          | 64              | no        | yes              | yes          | no        | no          | 25        |
| Idiopathic75       | Male       | C           | 66         | no          | 1010            | no        | yes              | yes          | no        | no          | 17.5      |
| Idiopathic76       | Male       | C           | 53         | no          | 60              | no        | yes              | yes          | no        | no          | 10        |
| Idiopathic77       | Male       | C           | 63         | no          | 7               | no        | yes              | yes          | no        | no          | 7.5       |
| Idiopathic78       | Female     | AA          | 48         | no          | 37              | no        | yes              | no           | no        | no          | 7.5       |
| Idiopathic79       | Female     | C           | 52         | no          | 156             | no        | yes              | yes          | no        | no          | 7.5       |
| Idiopathic8        | Male       | C           | 23         | no          | 11              | no        | yes              | yes          | no        | no          | 7.5       |
| Idiopathic80       | Female     | AA          | 63         | no          | 120             | yes       | yes              | yes          | yes       | no          | 17.5      |
| Idiopathic81       | Male       | C           | 49         | no          | 110             | no        | yes              | yes          | no        | no          | 22.5      |
| Idiopathic82       | Male       | C           | 32         | no          | 42              | no        | yes              | yes          | yes       | no          | 12.5      |
| Idiopathic83       | Male       | C           | 71         | no          | 132             | no        | yes              | no           | no        | no          | 7.5       |
| Idiopathic84       | Female     | C           | 53         | no          | 6               | yes       | yes              | yes          | no        | no          | 10        |
| Idiopathic85       | Male       | AA          | 63         | no          | 50              | no        | yes              | yes          | no        | no          | 7.5       |
| Idiopathic86       | Female     | C           | 54         | no          | 41              | yes       | no               | no           | no        | no          | 12.5      |
| Idiopathic9        | Male       | AA          | 27         | no          | 21              | no        | yes              | yes          | no        | no          | N/A       |
| Ischemic1          | Male       | N/A         | 62         | yes         | 36              | yes       | yes              | yes          | no        | no          | 12        |
| Ischemic10         | Male       | AA          | 62         | no          | 43              | no        | yes              | no           | no        | no          | 12.5      |
| Ischemic100        | Male       | C           | 60         | no          | N/A             | no        | yes              | yes          | no        | no          | 17.5      |
| Ischemic101        | Female     | C           | 45         | yes         | N/A             | no        | yes              | yes          | yes       | no          | 15        |
| Ischemic102        | Male       | C           | 66         | yes         | N/A             | no        | yes              | yes          | yes       | no          | 12.5      |
| Ischemic103        | Male       | H           | 57         | no          | 54              | yes       | yes              | yes          | no        | no          | 32.5      |
| Ischemic104        | Female     | C           | 64         | yes         | 15              | yes       | yes              | no           | yes       | no          | 40        |
| Ischemic105        | Male       | C           | 60         | yes         | 4               | no        | yes              | no           | no        | no          | 7.5       |
| Ischemic106        | Female     | C           | 61         | no          | 108             | yes       | yes              | yes          | yes       | no          | 7.5       |

| <b>GEO-ID</b>      | <b>sex</b> | <b>race</b> | <b>age</b> | <b>CABG</b> | <b>duration</b> | <b>DM</b> | <b>inotropes</b> | <b>ACE-I</b> | <b>BB</b> | <b>IABP</b> | <b>EF</b> |
|--------------------|------------|-------------|------------|-------------|-----------------|-----------|------------------|--------------|-----------|-------------|-----------|
| <b>(continued)</b> |            |             |            |             |                 |           |                  |              |           |             |           |
| Ischemic107        | Male       | AA          | 58         | no          | N/A             | no        | no               | no           | no        | no          | 7.5       |
| Ischemic108        | Male       | C           | 65         | yes         | 19              | yes       | yes              | yes          | yes       | no          | 7.5       |
| Ischemic11         | Male       | C           | 64         | yes         | 20              | no        | yes              | yes          | no        | no          | 12.5      |
| Ischemic12         | Female     | C           | 59         | yes         | N/A             | yes       | yes              | yes          | no        | yes         | 5         |
| Ischemic13         | Male       | AA          | 45         | no          | N/A             | no        | yes              | yes          | no        | no          | 10        |
| Ischemic14         | Male       | C           | 62         | yes         | N/A             | no        | no               | yes          | yes       | no          | 17.5      |
| Ischemic15         | Male       | C           | 68         | no          | 60              | no        | yes              | yes          | yes       | no          | 7.5       |
| Ischemic16         | Male       | C           | 63         | yes         | 24              | no        | yes              | yes          | yes       | no          | 25        |
| Ischemic17         | Male       | AA          | 58         | yes         | 15              | yes       | yes              | yes          | yes       | no          | 7.5       |
| Ischemic18         | Male       | C           | 62         | yes         | 11              | yes       | no               | yes          | yes       | no          | 32.5      |
| Ischemic19         | Male       | C           | 58         | yes         | 63              | no        | no               | yes          | yes       | no          | 10        |
| Ischemic2          | Male       | N/A         | 62         | no          | N/A             | no        | yes              | yes          | no        | no          | 17.5      |
| Ischemic20         | Male       | C           | 55         | yes         | 22              | no        | no               | yes          | yes       | no          | 12.5      |
| Ischemic21         | Male       | C           | 63         | yes         | 10              | yes       | yes              | yes          | yes       | no          | N/A       |
| Ischemic22         | Male       | C           | 64         | yes         | 28              | no        | yes              | no           | no        | yes         | 10        |
| Ischemic23         | Male       | AA          | 62         | no          | 96              | no        | yes              | yes          | yes       | no          | 7.5       |
| Ischemic24         | Male       | C           | 54         | yes         | 28              | yes       | yes              | yes          | no        | no          | 12.5      |
| Ischemic25         | Male       | C           | 65         | no          | 48              | no        | yes              | yes          | no        | no          | 5         |
| Ischemic26         | Female     | C           | 68         | yes         | 8               | yes       | yes              | yes          | yes       | no          | 12.5      |
| Ischemic27         | Female     | C           | 47         | yes         | N/A             | yes       | no               | no           | yes       | no          | 32.5      |
| Ischemic28         | Male       | AA          | 60         | yes         | N/A             | yes       | yes              | no           | no        | no          | 30        |
| Ischemic29         | Male       | C           | 58         | yes         | 3               | no        | no               | no           | yes       | no          | 10        |
| Ischemic3          | Male       | C           | 61         | yes         | N/A             | yes       | yes              | no           | no        | no          | 10        |
| Ischemic30         | Male       | C           | 68         | yes         | 22              | no        | yes              | yes          | yes       | no          | 12.5      |
| Ischemic31         | Male       | C           | 59         | yes         | 36              | no        | yes              | no           | yes       | no          | 12.5      |
| Ischemic32         | Male       | C           | 66         | yes         | 68              | no        | yes              | yes          | no        | no          | 7.5       |
| Ischemic33         | Male       | AA          | 63         | yes         | 41              | yes       | yes              | no           | yes       | yes         | 12.5      |
| Ischemic34         | Male       | C           | 56         | no          | N/A             | yes       | yes              | yes          | no        | yes         | 12.5      |
| Ischemic35         | Female     | C           | 65         | no          | 1               | yes       | yes              | no           | no        | yes         | 17.5      |
| Ischemic36         | Male       | C           | 68         | yes         | 90              | no        | yes              | no           | no        | no          | 7.5       |
| Ischemic37         | Male       | C           | 63         | yes         | 3               | no        | yes              | no           | no        | no          | 5         |
| Ischemic38         | Male       | AA          | 62         | no          | 60              | no        | yes              | no           | no        | no          | N/A       |
| Ischemic39         | Male       | C           | 47         | no          | 1               | no        | yes              | yes          | no        | yes         | 10        |
| Ischemic4          | Male       | AA          | 65         | yes         | 1               | no        | yes              | yes          | yes       | no          | 7.5       |
| Ischemic40         | Male       | N/A         | 49         | no          | 1               | no        | yes              | yes          | yes       | yes         | 7.5       |
| Ischemic41         | Male       | C           | 37         | yes         | N/A             | no        | yes              | no           | no        | yes         | 5         |
| Ischemic42         | Male       | C           | 63         | no          | 9               | yes       | yes              | yes          | no        | yes         | 5         |
| Ischemic43         | Male       | C           | 67         | yes         | 4               | no        | yes              | yes          | no        | no          | 22.5      |
| Ischemic44         | Male       | C           | 27         | yes         | 13              | no        | yes              | yes          | no        | no          | 22.5      |
| Ischemic45         | Male       | AA          | 61         | no          | 18              | no        | yes              | yes          | yes       | no          | 7.5       |
| Ischemic46         | Male       | C           | 68         | yes         | N/A             | no        | yes              | yes          | yes       | no          | 7.5       |
| Ischemic47         | Male       | C           | 64         | no          | 175             | no        | yes              | yes          | no        | no          | N/A       |
| Ischemic48         | Male       | C           | 67         | no          | 16              | yes       | yes              | yes          | no        | no          | 7.5       |
| Ischemic49         | Male       | C           | 59         | no          | 9               | no        | yes              | yes          | yes       | no          | 20        |
| Ischemic5          | Male       | C           | 57         | no          | 5               | yes       | yes              | no           | yes       | no          | 15        |
| Ischemic50         | Male       | AA          | 56         | no          | 212             | yes       | yes              | yes          | no        | no          | 17.5      |
| Ischemic51         | Male       | C           | 63         | yes         | 2               | yes       | yes              | yes          | no        | yes         | 5         |
| Ischemic52         | Male       | C           | 53         | no          | 17              | no        | yes              | yes          | no        | no          | 10        |

| <b>GEO-ID</b>      | <b>sex</b> | <b>race</b> | <b>age</b> | <b>CABG</b> | <b>duration</b> | <b>DM</b> | <b>inotropes</b> | <b>ACE-I</b> | <b>BB</b> | <b>IABP</b> | <b>EF</b> |
|--------------------|------------|-------------|------------|-------------|-----------------|-----------|------------------|--------------|-----------|-------------|-----------|
| <b>(continued)</b> |            |             |            |             |                 |           |                  |              |           |             |           |
| Ischemic53         | Male       | C           | 56         | yes         | 17              | yes       | yes              | yes          | yes       | no          | 17.5      |
| Ischemic54         | Male       | C           | 62         | yes         | 5               | no        | yes              | no           | no        | no          | 5         |
| Ischemic55         | Male       | AA          | 58         | yes         | 37              | no        | yes              | yes          | no        | no          | 25        |
| Ischemic56         | Male       | C           | 64         | no          | 7               | no        | yes              | yes          | no        | no          | 10        |
| Ischemic57         | Male       | C           | 41         | no          | 96              | no        | yes              | no           | yes       | no          | 17.5      |
| Ischemic58         | Male       | C           | 62         | yes         | 144             | yes       | yes              | no           | no        | no          | 12.5      |
| Ischemic59         | Male       | C           | 59         | no          | 28              | no        | yes              | yes          | no        | no          | 20        |
| Ischemic6          | Male       | C           | 52         | no          | 32              | yes       | yes              | yes          | no        | no          | 12.5      |
| Ischemic60         | Male       | C           | 51         | yes         | 9               | no        | yes              | yes          | no        | no          | 12.5      |
| Ischemic61         | Male       | C           | 54         | yes         | 4               | yes       | yes              | yes          | yes       | no          | 15        |
| Ischemic62         | Male       | C           | 62         | yes         | 6               | no        | yes              | yes          | yes       | yes         | 32.5      |
| Ischemic63         | Female     | C           | 65         | yes         | 1               | no        | yes              | yes          | yes       | no          | 25        |
| Ischemic64         | Male       | C           | 53         | no          | 9               | no        | yes              | yes          | no        | no          | 7.5       |
| Ischemic65         | Male       | AA          | 59         | yes         | 8               | no        | yes              | yes          | no        | no          | 20        |
| Ischemic66         | Male       | C           | 29         | yes         | 18              | yes       | no               | no           | yes       | no          | 25        |
| Ischemic67         | Male       | C           | 61         | yes         | 26              | yes       | yes              | yes          | no        | no          | 15        |
| Ischemic68         | Male       | C           | 46         | yes         | 5               | no        | yes              | yes          | yes       | no          | 17.5      |
| Ischemic69         | Male       | C           | 66         | no          | 37              | no        | yes              | yes          | yes       | yes         | 7.5       |
| Ischemic7          | Male       | H           | 57         | yes         | 56              | no        | yes              | yes          | yes       | no          | 7.5       |
| Ischemic70         | Male       | C           | 65         | no          | 54              | no        | yes              | yes          | yes       | no          | 15        |
| Ischemic71         | Male       | C           | 58         | yes         | 7               | no        | yes              | yes          | no        | no          | 17.5      |
| Ischemic72         | Male       | C           | 60         | yes         | N/A             | no        | yes              | no           | yes       | no          | 52.5      |
| Ischemic73         | Male       | C           | 60         | yes         | 168             | no        | yes              | yes          | yes       | no          | 15        |
| Ischemic74         | Male       | C           | 50         | yes         | N/A             | no        | yes              | no           | yes       | no          | 57.5      |
| Ischemic75         | Male       | C           | 65         | yes         | 80              | no        | yes              | yes          | no        | no          | 15        |
| Ischemic76         | Female     | C           | 42         | no          | 40              | yes       | no               | yes          | no        | no          | 32.5      |
| Ischemic77         | Male       | C           | 52         | yes         | 61              | yes       | yes              | yes          | no        | no          | 17.5      |
| Ischemic78         | Male       | C           | 62         | yes         | 4               | yes       | yes              | yes          | yes       | no          | 7.5       |
| Ischemic79         | Male       | N/A         | 60         | no          | 27              | no        | yes              | yes          | yes       | no          | 17.5      |
| Ischemic8          | Male       | AA          | 61         | no          | N/A             | no        | yes              | yes          | no        | no          | 10        |
| Ischemic80         | Male       | C           | 64         | no          | 5               | no        | yes              | yes          | no        | no          | 12.5      |
| Ischemic81         | Male       | C           | 66         | yes         | 46              | no        | yes              | yes          | yes       | no          | 12.5      |
| Ischemic82         | Male       | C           | 60         | no          | 2               | no        | no               | yes          | no        | no          | 12.5      |
| Ischemic83         | Male       | C           | 54         | yes         | 5               | no        | yes              | no           | yes       | no          | 20        |
| Ischemic84         | Female     | C           | 42         | no          | 14              | yes       | yes              | no           | yes       | no          | 25        |
| Ischemic85         | Male       | C           | 58         | yes         | 1               | no        | yes              | no           | no        | yes         | N/A       |
| Ischemic86         | Female     | C           | 16         | no          | 1               | no        | no               | no           | no        | no          | N/A       |
| Ischemic87         | Male       | C           | 64         | yes         | 10              | yes       | no               | no           | no        | no          | 10        |
| Ischemic88         | Female     | C           | 63         | no          | 2               | no        | yes              | yes          | no        | yes         | 22.5      |
| Ischemic89         | Male       | C           | 58         | no          | 1               | no        | yes              | yes          | no        | no          | 30        |
| Ischemic9          | Male       | AA          | 58         | no          | 66              | no        | yes              | yes          | no        | yes         | 12.5      |
| Ischemic90         | Female     | C           | 61         | no          | N/A             | yes       | no               | no           | no        | no          | 12.5      |
| Ischemic91         | Female     | C           | 55         | yes         | N/A             | no        | yes              | yes          | yes       | no          | 20        |
| Ischemic92         | Male       | C           | 56         | no          | 72              | yes       | yes              | yes          | no        | no          | 7.5       |
| Ischemic93         | Male       | C           | 59         | yes         | 20              | no        | no               | yes          | no        | no          | 12.5      |
| Ischemic94         | Male       | C           | 53         | no          | 43              | no        | no               | yes          | no        | no          | 12.5      |
| Ischemic95         | Male       | C           | 62         | yes         | N/A             | no        | no               | yes          | yes       | no          | 12.5      |
| Ischemic96         | Male       | C           | 62         | yes         | 30              | yes       | yes              | yes          | no        | no          | 10        |

| <b>GEO-ID</b>      | <b>sex</b> | <b>race</b> | <b>age</b> | <b>CABG</b> | <b>duration</b> | <b>DM</b> | <b>inotropes</b> | <b>ACE-I</b> | <b>BB</b> | <b>IABP</b> | <b>EF</b> |
|--------------------|------------|-------------|------------|-------------|-----------------|-----------|------------------|--------------|-----------|-------------|-----------|
| <b>(continued)</b> |            |             |            |             |                 |           |                  |              |           |             |           |
| Ischemic97         | Male       | C           | 58         | yes         | N/A             | yes       | no               | yes          | no        | no          | 27.5      |
| Ischemic98         | Female     | C           | 41         | no          | 1               | no        | no               | yes          | yes       | yes         | 5         |
| Ischemic99         | Male       | C           | 69         | yes         | 12              | no        | yes              | yes          | no        | no          | 20        |
| NonFailing1        | Female     | N/A         | 60         | no          | N/A             | yes       | yes              | yes          | no        | no          | 55        |
| NonFailing11       | Female     | N/A         | 41         | no          | N/A             | no        | no               | no           | yes       | no          | N/A       |
| NonFailing12       | Male       | C           | 55         | no          | N/A             | yes       | no               | no           | no        | no          | 45        |
| NonFailing13       | Female     | N/A         | 59         | no          | N/A             | no        | yes              | no           | no        | no          | 60        |
| NonFailing14       | Male       | N/A         | 44         | no          | N/A             | no        | no               | no           | no        | no          | N/A       |
| NonFailing15       | Female     | N/A         | 63         | no          | N/A             | no        | yes              | no           | yes       | no          | 65        |
| NonFailing16       | Male       | C           | 27         | no          | N/A             | no        | no               | no           | no        | no          | 60        |
| NonFailing2        | Female     | N/A         | 59         | no          | N/A             | no        | yes              | no           | no        | no          | N/A       |
| NonFailing3        | Female     | N/A         | 62         | no          | N/A             | no        | no               | no           | no        | no          | 45        |
| NonFailing4        | Male       | N/A         | 65         | no          | N/A             | yes       | no               | no           | no        | no          | 57.5      |
| NonFailing5        | Female     | N/A         | 64         | no          | N/A             | yes       | no               | no           | no        | no          | 55        |
| NonFailing6        | Male       | N/A         | 66         | no          | N/A             | no        | no               | no           | no        | no          | 60        |
| NonFailing7        | Female     | N/A         | 58         | no          | N/A             | no        | no               | no           | yes       | no          | 60        |
| NonFailing8        | Male       | N/A         | 62         | no          | N/A             | no        | yes              | no           | yes       | no          | 50        |
| NonFailing9        | Female     | N/A         | 57         | no          | N/A             | no        | no               | no           | no        | no          | N/A       |
| NonFailing10       | N/A        | N/A         | N/A        | N/A         | N/A             | N/A       | N/A              | N/A          | N/A       | N/A         | N/A       |

**GEO-ID** = sample ID in Gene Expression Omnibus; **CABG** = coronary artery bypass graft; **DM** = diabetes mellitus; **ACE-I** = ACE-inhibitor; **BB** = beta-blocker; **IABP** = intra-aortic ballon-pump. **EF** = ejection fraction.

**Supplemental Table 3.** Transcripts consistently regulated in at least 5 of 10 studies in human, dog, mouse and rat HF microarray datasets

| UPREGULATED | UPREGULATED                                                                                                                         | UPREGULATED                       |
|-------------|-------------------------------------------------------------------------------------------------------------------------------------|-----------------------------------|
| Gene Symbol | Gene Name                                                                                                                           | identified in x out of 10 studies |
| ACOT9       | acyl-CoA thioesterase 9                                                                                                             | 5                                 |
| ACTN1       | actinin, alpha 1                                                                                                                    | 6                                 |
| ACTR3       | ARP3 actin-related protein 3 homolog (yeast)                                                                                        | 5                                 |
| ADFP        | adipose differentiation-related protein                                                                                             | 5                                 |
| AKAP13      | A kinase (PRKA) anchor protein 13                                                                                                   | 5                                 |
| ANXA1       | annexin A1                                                                                                                          | 5                                 |
| ANXA2       | annexin A2                                                                                                                          | 6                                 |
| ANXA5       | annexin A5                                                                                                                          | 5                                 |
| ANXA7       | annexin A7                                                                                                                          | 5                                 |
| ARHGDI3     | Rho GDP dissociation inhibitor (GDI) beta                                                                                           | 6                                 |
| ARPC3       | similar to actin related protein 2/3 complex subunit 3; hypothetical LOC729841; actin related protein 2/3 complex, subunit 3, 21kDa | 6                                 |
| ARPC5       | actin related protein 2/3 complex, subunit 5, 16kDa                                                                                 | 5                                 |
| ASPN        | asporin                                                                                                                             | 5                                 |
| ATP1B3      | ATPase, Na <sup>+</sup> /K <sup>+</sup> transporting, beta 3 polypeptide                                                            | 6                                 |
| BMP2K       | BMP2 inducible kinase                                                                                                               | 5                                 |
| BTG3        | BTG family, member 3                                                                                                                | 6                                 |
| CAB39       | calcium binding protein 39                                                                                                          | 5                                 |
| CAP1        | CAP, adenylate cyclase-associated protein 1 (yeast)                                                                                 | 5                                 |
| CAPG        | capping protein (actin filament), gelsolin-like                                                                                     | 5                                 |
| CARHSP1     | calcium regulated heat stable protein 1, 24kDa                                                                                      | 5                                 |
| CARS        | cysteinyl-tRNA synthetase                                                                                                           | 5                                 |
| CASP3       | caspase 3, apoptosis-related cysteine peptidase                                                                                     | 5                                 |
| CCL2        | chemokine (C-C motif) ligand 2                                                                                                      | 6                                 |
| CD44        | CD44 molecule (Indian blood group)                                                                                                  | 8                                 |
| CDC42SE1    | CDC42 small effector 1                                                                                                              | 5                                 |
| CDR2        | cerebellar degeneration-related protein 2, 62kDa                                                                                    | 5                                 |
| CKAP4       | cytoskeleton-associated protein 4                                                                                                   | 5                                 |
| COL16A1     | collagen, type XVI, alpha 1                                                                                                         | 5                                 |
| COL1A2      | collagen, type I, alpha 2                                                                                                           | 5                                 |
| COL4A1      | collagen, type IV, alpha 1                                                                                                          | 7                                 |
| COL4A2      | collagen, type IV, alpha 2                                                                                                          | 6                                 |
| COL5A1      | collagen, type V, alpha 1                                                                                                           | 5                                 |
| COL5A2      | collagen, type V, alpha 2                                                                                                           | 5                                 |
| COL6A3      | collagen, type VI, alpha 3                                                                                                          | 5                                 |
| CP          | ceruloplasmin (ferroxidase)                                                                                                         | 5                                 |
| CSF1R       | colony stimulating factor 1 receptor                                                                                                | 5                                 |
| CSNK1D      | casein kinase 1, delta                                                                                                              | 7                                 |
| CTGF        | connective tissue growth factor                                                                                                     | 7                                 |
| CTSK        | cathepsin K                                                                                                                         | 5                                 |
| CTSS        | cathepsin S                                                                                                                         | 5                                 |



| UPREGULATED<br>continued | UPREGULATED<br>continued                                                                                                   | UPREGULATED<br>continued                |
|--------------------------|----------------------------------------------------------------------------------------------------------------------------|-----------------------------------------|
| Gene Symbol              | Gene Name                                                                                                                  | identified in x<br>out of 10<br>studies |
| CTSZ                     | cathepsin Z                                                                                                                | 5                                       |
| CTTN                     | cortactin                                                                                                                  | 6                                       |
| CYBB                     | cytochrome b-245, beta polypeptide                                                                                         | 5                                       |
| DBN1                     | drebrin 1                                                                                                                  | 5                                       |
| DNAJC3                   | DnaJ (Hsp40) homolog, subfamily C, member 3                                                                                | 5                                       |
| DUSP27                   | dual specificity phosphatase 27 (putative)                                                                                 | 5                                       |
| DUSP6                    | dual specificity phosphatase 6                                                                                             | 6                                       |
| DYNC1LI2                 | dynein, cytoplasmic 1, light intermediate chain 2                                                                          | 5                                       |
| EDEM1                    | ER degradation enhancer, mannosidase alpha-like 1                                                                          | 5                                       |
| EIF4G3                   | eukaryotic translation initiation factor 4 gamma, 3                                                                        | 5                                       |
| EMP1                     | epithelial membrane protein 1                                                                                              | 5                                       |
| ENG                      | endoglin                                                                                                                   | 5                                       |
| EPS15                    | epidermal growth factor receptor pathway substrate 15                                                                      | 5                                       |
| FBN1                     | fibrillin 1                                                                                                                | 5                                       |
| FGL2                     | fibrinogen-like 2                                                                                                          | 5                                       |
| FHL1                     | four and a half LIM domains 1                                                                                              | 6                                       |
| FN1                      | fibronectin 1                                                                                                              | 6                                       |
| GBA                      | glucosidase, beta; acid (includes glucosylceramidase)                                                                      | 5                                       |
| GNAI2                    | guanine nucleotide binding protein (G protein), alpha inhibiting activity polypeptide 2                                    | 5                                       |
| GPX1                     | glutathione peroxidase 1                                                                                                   | 5                                       |
| HEBP1                    | heme binding protein 1                                                                                                     | 5                                       |
| HN1                      | hematological and neurological expressed 1                                                                                 | 7                                       |
| HSP90AA1                 | heat shock protein 90kDa alpha (cytosolic), class A member 2; heat shock protein 90kDa alpha (cytosolic), class A member 1 | 5                                       |
| HSPB1                    | heat shock 27kDa protein-like 2 pseudogene; heat shock 27kDa protein 1                                                     | 5                                       |
| ICAM1                    | intercellular adhesion molecule 1                                                                                          | 5                                       |
| IGFBP7                   | insulin-like growth factor binding protein 7                                                                               | 5                                       |
| IL13RA1                  | interleukin 13 receptor, alpha 1                                                                                           | 5                                       |
| ITGA5                    | integrin, alpha 5 (fibronectin receptor, alpha polypeptide)                                                                | 5                                       |
| ITGAV                    | integrin, alpha V (vitronectin receptor, alpha polypeptide, antigen CD51)                                                  | 5                                       |
| LAMA4                    | laminin, alpha 4                                                                                                           | 7                                       |
| LAMC1                    | laminin, gamma 1 (formerly LAMB2)                                                                                          | 5                                       |
| LAMP2                    | lysosomal-associated membrane protein 2                                                                                    | 6                                       |
| LCP1                     | lymphocyte cytosolic protein 1 (L-plastin)                                                                                 | 5                                       |
| LITAF                    | lipopolysaccharide-induced TNF factor                                                                                      | 6                                       |
| LMNA                     | lamin A/C                                                                                                                  | 6                                       |
| LOXL2                    | lysyl oxidase-like 2                                                                                                       | 6                                       |
| LXN                      | latexin                                                                                                                    | 6                                       |
| LYN                      | v-yes-1 Yamaguchi sarcoma viral related oncogene homolog                                                                   | 5                                       |
| MAP2K3                   | mitogen-activated protein kinase kinase 3                                                                                  | 5                                       |

| UPREGULATED<br>continued | UPREGULATED<br>continued                                                                                  | UPREGULATED<br>continued                |
|--------------------------|-----------------------------------------------------------------------------------------------------------|-----------------------------------------|
| Gene Symbol              | Gene Name                                                                                                 | identified in x<br>out of 10<br>studies |
| MFAP4                    | microfibrillar-associated protein 4                                                                       | 5                                       |
| MGP                      | matrix Gla protein                                                                                        | 5                                       |
| MMP14                    | matrix metalloproteinase 14 (membrane-inserted)                                                           | 5                                       |
| MOBK1B                   | MOB1, Mps One Binder kinase activator-like 1B (yeast)                                                     | 5                                       |
| MSN                      | moesin                                                                                                    | 5                                       |
| MTAP                     | methylthioadenosine phosphorylase                                                                         | 5                                       |
| MTPN                     | myotrophin; leucine zipper protein 6                                                                      | 5                                       |
| MVP                      | major vault protein                                                                                       | 6                                       |
| MYH10                    | myosin, heavy chain 10, non-muscle                                                                        | 5                                       |
| NCL                      | nucleolin                                                                                                 | 5                                       |
| NFKBIE                   | nuclear factor of kappa light polypeptide gene enhancer in B-cells inhibitor, epsilon                     | 5                                       |
| NRAP                     | nebulin-related anchoring protein                                                                         | 5                                       |
| PABPC1                   | poly(A) binding protein, cytoplasmic pseudogene 5;<br>poly(A) binding protein, cytoplasmic 1              | 5                                       |
| PDLIM5                   | PDZ and LIM domain 5                                                                                      | 5                                       |
| PFKP                     | phosphofructokinase, platelet                                                                             | 6                                       |
| PLAUR                    | plasminogen activator, urokinase receptor                                                                 | 5                                       |
| PLD3                     | phospholipase D family, member 3                                                                          | 5                                       |
| PLP2                     | proteolipid protein 2 (colonic epithelium-enriched)                                                       | 6                                       |
| POSTN                    | periostin, osteoblast specific factor                                                                     | 6                                       |
| PPIB                     | peptidylprolyl isomerase B (cyclophilin B)                                                                | 5                                       |
| PRSS23                   | protease, serine, 23                                                                                      | 5                                       |
| PSMB8                    | proteasome (prosome, macropain) subunit, beta type, 8<br>(large multifunctional peptidase 7)              | 5                                       |
| RAB23                    | RAB23, member RAS oncogene family                                                                         | 5                                       |
| RBM9                     | RNA binding motif protein 9                                                                               | 5                                       |
| RHOC                     | ras homolog gene family, member C                                                                         | 6                                       |
| RRAS2                    | related RAS viral (r-ras) oncogene homolog 2; similar to<br>related RAS viral (r-ras) oncogene homolog 2  | 5                                       |
| S100A11                  | S100 calcium binding protein A11; S100 calcium binding<br>protein A11 pseudogene                          | 5                                       |
| SDC2                     | syndecan 2                                                                                                | 5                                       |
| SEC61A1                  | Sec61 alpha 1 subunit (S. cerevisiae)                                                                     | 6                                       |
| SEL1L                    | sel-1 suppressor of lin-12-like (C. elegans)                                                              | 5                                       |
| SERPINE1                 | serpin peptidase inhibitor, clade E (nexin, plasminogen<br>activator inhibitor type 1), member 1          | 5                                       |
| SERPINF1                 | serpin peptidase inhibitor, clade F (alpha-2 antiplasmin,<br>pigment epithelium derived factor), member 1 | 5                                       |
| SLC16A3                  | solute carrier family 16, member 3 (monocarboxylic acid<br>transporter 4)                                 | 5                                       |
| SLC2A1                   | solute carrier family 2 (facilitated glucose transporter),<br>member 1                                    | 5                                       |
| SLC6A6                   | solute carrier family 6 (neurotransmitter transporter,<br>taurine), member 6                              | 5                                       |

| <b>UPREGULATED</b><br>continued | <b>UPREGULATED</b><br>continued                                                                   | <b>UPREGULATED</b><br>continued                  |
|---------------------------------|---------------------------------------------------------------------------------------------------|--------------------------------------------------|
| <b>Gene Symbol</b>              | <b>Gene Name</b>                                                                                  | <b>identified in x<br/>out of 10<br/>studies</b> |
| SMARCA5                         | SWI/SNF related, matrix associated, actin dependent regulator of chromatin, subfamily a, member 5 | 5                                                |
| SPARC                           | secreted protein, acidic, cysteine-rich (osteonectin)                                             | 5                                                |
| SPP1                            | secreted phosphoprotein 1                                                                         | 5                                                |
| SPRED1                          | sprouty-related, EVH1 domain containing 1                                                         | 5                                                |
| SRPX2                           | sushi-repeat-containing protein, X-linked 2                                                       | 5                                                |
| STAT3                           | signal transducer and activator of transcription 3 (acute-phase response factor)                  | 6                                                |
| SVEP1                           | sushi, von Willebrand factor type A, EGF and pentraxin domain containing 1                        | 5                                                |
| TGFB2                           | transforming growth factor, beta 2                                                                | 5                                                |
| TGFBR2                          | transforming growth factor, beta receptor II (70/80kDa)                                           | 6                                                |
| TGM2                            | transglutaminase 2 (C polypeptide, protein-glutamine-gamma-glutamyltransferase)                   | 7                                                |
| THBS1                           | thrombospondin 1                                                                                  | 5                                                |
| TIMP1                           | TIMP metalloproteinase inhibitor 1                                                                | 7                                                |
| TMEM43                          | transmembrane protein 43                                                                          | 5                                                |
| TNC                             | tenascin C                                                                                        | 5                                                |
| TNFAIP1                         | tumor necrosis factor, alpha-induced protein 1 (endothelial)                                      | 5                                                |
| TUBB2A                          | tubulin, beta 2A                                                                                  | 5                                                |
| UFM1                            | ubiquitin-fold modifier 1                                                                         | 5                                                |
| VIM                             | vimentin                                                                                          | 5                                                |
| YWHAQ                           | tyrosine 3-monooxygenase/tryptophan 5-monooxygenase activation protein, theta polypeptide         | 5                                                |
| ZEB2                            | zinc finger E-box binding homeobox 2                                                              | 5                                                |
| ZYX                             | zyxin                                                                                             | 5                                                |

| <b>DOWN<br/>REGULATED</b> | <b>DOWNREGULATED</b>                                        | <b>DOWN<br/>REGULATED</b>                        |
|---------------------------|-------------------------------------------------------------|--------------------------------------------------|
| <b>Gene Symbol</b>        | <b>Gene Name</b>                                            | <b>identified in x<br/>out of 10<br/>studies</b> |
| A2BP1                     | ataxin 2-binding protein 1                                  | 5                                                |
| ABCC9                     | ATP-binding cassette, sub-family C (CFTR/MRP), member 9     | 6                                                |
| ABHD11                    | abhydrolase domain containing 11                            | 5                                                |
| ABLIM1                    | actin binding LIM protein 1                                 | 5                                                |
| ACAA2                     | hypothetical LOC648603; acetyl-Coenzyme A acyltransferase 2 | 7                                                |
| ACAD9                     | acyl-Coenzyme A dehydrogenase family, member 9              | 5                                                |
| ACADM                     | acyl-Coenzyme A dehydrogenase, C-4 to C-12 straight chain   | 6                                                |
| ACADVL                    | acyl-Coenzyme A dehydrogenase, very long chain              | 7                                                |
| ACAT1                     | acetyl-Coenzyme A acetyltransferase 1                       | 8                                                |
| ACO1                      | aconitase 1, soluble                                        | 5                                                |

| <b>DOWN REGULATED continued</b> | <b>DOWNREGULATED continued</b>                                                                       | <b>DOWN REGULATED continued</b>          |
|---------------------------------|------------------------------------------------------------------------------------------------------|------------------------------------------|
| <b>Gene Symbol</b>              | <b>Gene Name</b>                                                                                     | <b>identified in x out of 10 studies</b> |
| ACO2                            | aconitase 2, mitochondrial                                                                           | 8                                        |
| ACSL1                           | acyl-CoA synthetase long-chain family member 1                                                       | 8                                        |
| ACSL6                           | acyl-CoA synthetase long-chain family member 6                                                       | 5                                        |
| ACSS1                           | acyl-CoA synthetase short-chain family member 1                                                      | 5                                        |
| ACTR3B                          | ARP3 actin-related protein 3 homolog B (yeast)                                                       | 5                                        |
| ADD3                            | adducin 3 (gamma)                                                                                    | 6                                        |
| ADHFE1                          | alcohol dehydrogenase, iron containing, 1                                                            | 6                                        |
| ADK                             | adenosine kinase                                                                                     | 7                                        |
| ADRB1                           | adrenergic, beta-1-, receptor                                                                        | 5                                        |
| AFG3L2                          | AFG3 ATPase family gene 3-like 2 (yeast)                                                             | 5                                        |
| AGL                             | amylo-1, 6-glucosidase, 4-alpha-glucanotransferase                                                   | 5                                        |
| AGPAT3                          | 1-acylglycerol-3-phosphate O-acyltransferase 3                                                       | 6                                        |
| AGTPBP1                         | ATP/GTP binding protein 1                                                                            | 5                                        |
| AIFM1                           | apoptosis-inducing factor, mitochondrion-associated, 1                                               | 6                                        |
| AK1                             | adenylate kinase 1                                                                                   | 7                                        |
| AKAP9                           | A kinase (PRKA) anchor protein (yotiao) 9                                                            | 5                                        |
| ALAD                            | aminolevulinate, delta-, dehydratase                                                                 | 5                                        |
| ALAS1                           | aminolevulinate, delta-, synthase 1                                                                  | 6                                        |
| ALDH2                           | aldehyde dehydrogenase 2 family (mitochondrial)                                                      | 7                                        |
| ALDH6A1                         | aldehyde dehydrogenase 6 family, member A1                                                           | 6                                        |
| ALDH9A1                         | aldehyde dehydrogenase 9 family, member A1                                                           | 6                                        |
| ANGPT1                          | angiopoietin 1                                                                                       | 5                                        |
| ANK1                            | ankyrin 1, erythrocytic                                                                              | 9                                        |
| ANK2                            | ankyrin 2, neuronal                                                                                  | 5                                        |
| ANKMY2                          | ankyrin repeat and MYND domain containing 2                                                          | 6                                        |
| ANKRD9                          | ankyrin repeat domain 9                                                                              | 5                                        |
| ANXA3                           | annexin A3                                                                                           | 5                                        |
| AP3M1                           | adaptor-related protein complex 3, mu 1 subunit                                                      | 5                                        |
| AP4B1                           | adaptor-related protein complex 4, beta 1 subunit                                                    | 5                                        |
| Apbb1                           | amyloid beta (A4) precursor protein-binding, family B, member 1 (Fe65)                               | 5                                        |
| AQP1                            | aquaporin 1 (Colton blood group)                                                                     | 7                                        |
| ART3                            | ADP-ribosyltransferase 3                                                                             | 5                                        |
| ASB2                            | ankyrin repeat and SOCS box-containing 2                                                             | 7                                        |
| ASF1A                           | ASF1 anti-silencing function 1 homolog A (S. cerevisiae)                                             | 6                                        |
| ASPH                            | aspartate beta-hydroxylase                                                                           | 8                                        |
| ATP1A2                          | ATPase, Na <sup>+</sup> /K <sup>+</sup> transporting, alpha 2 (+) polypeptide                        | 5                                        |
| ATP2A2                          | ATPase, Ca <sup>++</sup> transporting, cardiac muscle, slow twitch 2                                 | 7                                        |
| ATP5A1                          | ATP synthase, H <sup>+</sup> transporting, mitochondrial F1 complex, alpha subunit 1, cardiac muscle | 8                                        |
| ATP5C1                          | ATP synthase, H <sup>+</sup> transporting, mitochondrial F1 complex, gamma polypeptide 1             | 8                                        |
| ATP5D                           | ATP synthase, H <sup>+</sup> transporting, mitochondrial F1 complex, delta subunit                   | 6                                        |

| <b>DOWN REGULATED continued</b> | <b>DOWNREGULATED continued</b>                                                            | <b>DOWN REGULATED continued</b>          |
|---------------------------------|-------------------------------------------------------------------------------------------|------------------------------------------|
| <b>Gene Symbol</b>              | <b>Gene Name</b>                                                                          | <b>identified in x out of 10 studies</b> |
| ATP5E                           | ATP synthase, H+ transporting, mitochondrial F1 complex, epsilon subunit                  | 5                                        |
| ATP5F1                          | ATP synthase, H+ transporting, mitochondrial F0 complex, subunit B1                       | 7                                        |
| ATP5G1                          | ATP synthase, H+ transporting, mitochondrial F0 complex, subunit C1 (subunit 9)           | 5                                        |
| ATP5G3                          | ATP synthase, H+ transporting, mitochondrial F0 complex, subunit C3 (subunit 9)           | 5                                        |
| ATP5H                           | ATP synthase, H+ transporting, mitochondrial F0 complex, subunit d                        | 5                                        |
| ATP5J                           | ATP synthase, H+ transporting, mitochondrial F0 complex, subunit F6                       | 6                                        |
| ATPAF1                          | ATP synthase mitochondrial F1 complex assembly factor 1                                   | 5                                        |
| ATXN10                          | ataxin 10                                                                                 | 5                                        |
| AUH                             | AU RNA binding protein/enoyl-Coenzyme A hydratase                                         | 7                                        |
| BBS2                            | Bardet-Biedl syndrome 2                                                                   | 5                                        |
| BCKDHA                          | branched chain keto acid dehydrogenase E1, alpha polypeptide                              | 5                                        |
| BCKDK                           | branched chain ketoacid dehydrogenase kinase                                              | 7                                        |
| BCL2L13                         | BCL2-like 13 (apoptosis facilitator)                                                      | 5                                        |
| BCS1L                           | BCS1-like (yeast)                                                                         | 7                                        |
| BRD3                            | bromodomain containing 3                                                                  | 5                                        |
| BRP44L                          | brain protein 44-like                                                                     | 6                                        |
| BTBD1                           | BTB (POZ) domain containing 1                                                             | 5                                        |
| BZW2                            | basic leucine zipper and W2 domains 2                                                     | 5                                        |
| C1QBP                           | complement component 1, q subcomponent binding protein                                    | 5                                        |
| CABC1                           | chaperone, ABC1 activity of bc1 complex homolog (S. pombe)                                | 8                                        |
| CAND2                           | cullin-associated and neddylation-dissociated 2 (putative)                                | 5                                        |
| CAT                             | catalase                                                                                  | 5                                        |
| CAV2                            | caveolin 2                                                                                | 5                                        |
| CBR4                            | carbonyl reductase 4                                                                      | 5                                        |
| CCBL1                           | cysteine conjugate-beta lyase, cytoplasmic                                                | 5                                        |
| CCDC28A                         | coiled-coil domain containing 28A                                                         | 5                                        |
| CCDC91                          | coiled-coil domain containing 91                                                          | 5                                        |
| CCNG1                           | cyclin G1                                                                                 | 5                                        |
| CCNH                            | cyclin H                                                                                  | 5                                        |
| CD36                            | CD36 molecule (thrombospondin receptor)                                                   | 8                                        |
| CDH13                           | cadherin 13, H-cadherin (heart)                                                           | 5                                        |
| CDKN1B                          | cyclin-dependent kinase inhibitor 1B (p27, Kip1)                                          | 5                                        |
| CHPT1                           | choline phosphotransferase 1                                                              | 6                                        |
| CIAPIN1                         | cytokine induced apoptosis inhibitor 1; cytokine induced apoptosis inhibitor 1 pseudogene | 6                                        |
| CISD1                           | CDGSH iron sulfur domain 1                                                                | 8                                        |

| <b>DOWN REGULATED continued</b> | <b>DOWNRREGULATED continued</b>                                                       | <b>DOWN REGULATED continued</b>          |
|---------------------------------|---------------------------------------------------------------------------------------|------------------------------------------|
| <b>Gene Symbol</b>              | <b>Gene Name</b>                                                                      | <b>identified in x out of 10 studies</b> |
| CKM                             | creatine kinase, muscle                                                               | 5                                        |
| CKMT2                           | creatine kinase, mitochondrial 2 (sarcomeric)                                         | 6                                        |
| CLASP1                          | cytoplasmic linker associated protein 1                                               | 5                                        |
| CLPX                            | ClpX caseinolytic peptidase X homolog (E. coli)                                       | 5                                        |
| CMBL                            | carboxymethylenebutenolidase homolog (Pseudomonas)                                    | 5                                        |
| CMTM8                           | CKLF-like MARVEL transmembrane domain containing 8                                    | 5                                        |
| COG2                            | component of oligomeric golgi complex 2                                               | 5                                        |
| COMMD1                          | copper metabolism (Murr1) domain containing 1                                         | 5                                        |
| COPS3                           | COP9 constitutive photomorphogenic homolog subunit 3 (Arabidopsis)                    | 5                                        |
| COPS5                           | COP9 constitutive photomorphogenic homolog subunit 5 (Arabidopsis)                    | 5                                        |
| COPS6                           | COP9 constitutive photomorphogenic homolog subunit 6 (Arabidopsis)                    | 5                                        |
| COQ10A                          | coenzyme Q10 homolog A (S. cerevisiae)                                                | 6                                        |
| COQ2                            | coenzyme Q2 homolog, prenyltransferase (yeast)                                        | 7                                        |
| COQ3                            | coenzyme Q3 homolog, methyltransferase (S. cerevisiae)                                | 5                                        |
| COQ5                            | coenzyme Q5 homolog, methyltransferase (S. cerevisiae)                                | 5                                        |
| COQ9                            | coenzyme Q9 homolog (S. cerevisiae)                                                   | 6                                        |
| CORO6                           | coronin 6                                                                             | 5                                        |
| COX17                           | COX17 cytochrome c oxidase assembly homolog (S. cerevisiae)                           | 5                                        |
| COX5A                           | cytochrome c oxidase subunit Va                                                       | 5                                        |
| COX6B1                          | cytochrome c oxidase subunit Vib polypeptide 1 (ubiquitous)                           | 5                                        |
| COX6C                           | cytochrome c oxidase subunit VIc                                                      | 5                                        |
| COX7A2                          | cytochrome c oxidase subunit VIIa polypeptide 2 (liver)                               | 5                                        |
| COX7A2L                         | cytochrome c oxidase subunit VIIa polypeptide 2 like                                  | 5                                        |
| CPSF6                           | cleavage and polyadenylation specific factor 6, 68kDa                                 | 5                                        |
| CPT2                            | carnitine palmitoyltransferase 2                                                      | 7                                        |
| CRADD                           | CASP2 and RIPK1 domain containing adaptor with death domain                           | 5                                        |
| CRAT                            | carnitine acetyltransferase                                                           | 7                                        |
| CRIPT                           | cysteine-rich PDZ-binding protein                                                     | 5                                        |
| CS                              | citrate synthase                                                                      | 5                                        |
| CSTF1                           | cleavage stimulation factor, 3' pre-RNA, subunit 1, 50kDa                             | 5                                        |
| CUL3                            | cullin 3                                                                              | 5                                        |
| CYC1                            | cytochrome c-1                                                                        | 6                                        |
| CYCS                            | cytochrome c, somatic                                                                 | 8                                        |
| DAP3                            | death associated protein 3                                                            | 5                                        |
| DBI                             | diazepam binding inhibitor (GABA receptor modulator, acyl-Coenzyme A binding protein) | 5                                        |
| DBT                             | dihydrolipoamide branched chain transacylase E2                                       | 5                                        |
| DCI                             | dodecenoyl-Coenzyme A delta isomerase (3,2 trans-enoyl-Coenzyme A isomerase)          | 7                                        |

| <b>DOWN REGULATED continued</b> | <b>DOWNREGULATED continued</b>                                                                                                      | <b>DOWN REGULATED continued</b>          |
|---------------------------------|-------------------------------------------------------------------------------------------------------------------------------------|------------------------------------------|
| <b>Gene Symbol</b>              | <b>Gene Name</b>                                                                                                                    | <b>identified in x out of 10 studies</b> |
| DCTN6                           | dynactin 6                                                                                                                          | 6                                        |
| DDO                             | D-aspartate oxidase                                                                                                                 | 6                                        |
| DECR1                           | 2,4-dienoyl CoA reductase 1, mitochondrial                                                                                          | 8                                        |
| DHRS7C                          | dehydrogenase/reductase (SDR family) member 7C                                                                                      | 7                                        |
| DLAT                            | dihydrolipoamide S-acetyltransferase                                                                                                | 6                                        |
| DLD                             | dihydrolipoamide dehydrogenase                                                                                                      | 6                                        |
| DLST                            | dihydrolipoamide S-succinyltransferase (E2 component of 2-oxo-glutarate complex); dihydrolipoamide S-succinyltransferase pseudogene | 6                                        |
| DNPEP                           | aspartyl aminopeptidase                                                                                                             | 6                                        |
| DPF2                            | D4, zinc and double PHD fingers family 2                                                                                            | 5                                        |
| DPF3                            | D4, zinc and double PHD fingers, family 3                                                                                           | 5                                        |
| DRG1                            | developmentally regulated GTP binding protein 1                                                                                     | 5                                        |
| DTNA                            | dystrobrevin, alpha                                                                                                                 | 5                                        |
| DTNBP1                          | dystrobrevin binding protein 1                                                                                                      | 5                                        |
| DUT                             | deoxyuridine triphosphatase                                                                                                         | 7                                        |
| DYRK2                           | dual-specificity tyrosine-(Y)-phosphorylation regulated kinase 2                                                                    | 5                                        |
| EAPP                            | E2F-associated phosphoprotein                                                                                                       | 5                                        |
| EBAG9                           | estrogen receptor binding site associated, antigen, 9                                                                               | 5                                        |
| ECH1                            | enoyl Coenzyme A hydratase 1, peroxisomal                                                                                           | 7                                        |
| ECHDC2                          | enoyl Coenzyme A hydratase domain containing 2                                                                                      | 5                                        |
| ECSIT                           | ECSIT homolog (Drosophila)                                                                                                          | 5                                        |
| EDNRA                           | endothelin receptor type A                                                                                                          | 6                                        |
| EHHADH                          | enoyl-Coenzyme A, hydratase/3-hydroxyacyl Coenzyme A dehydrogenase                                                                  | 5                                        |
| EIF3E                           | eukaryotic translation initiation factor 3, subunit E                                                                               | 5                                        |
| ENDOG                           | endonuclease G                                                                                                                      | 6                                        |
| ENO3                            | enolase 3 (beta, muscle)                                                                                                            | 6                                        |
| EPHA4                           | EPH receptor A4                                                                                                                     | 5                                        |
| EPHX2                           | epoxide hydrolase 2, cytoplasmic                                                                                                    | 7                                        |
| EPM2AIP1                        | EPM2A (laforin) interacting protein 1                                                                                               | 6                                        |
| ESD                             | esterase D/formylglutathione hydrolase                                                                                              | 5                                        |
| ETFA                            | electron-transfer-flavoprotein, alpha polypeptide                                                                                   | 5                                        |
| ETFB                            | electron-transfer-flavoprotein, beta polypeptide                                                                                    | 7                                        |
| ETFDH                           | electron-transferring-flavoprotein dehydrogenase                                                                                    | 7                                        |
| EZH1                            | enhancer of zeste homolog 1 (Drosophila)                                                                                            | 5                                        |
| FAF1                            | Fas (TNFRSF6) associated factor 1                                                                                                   | 6                                        |
| FAHD2A                          | fumarylacetoacetate hydrolase domain containing 2A                                                                                  | 7                                        |
| FARS2                           | phenylalanyl-tRNA synthetase 2, mitochondrial                                                                                       | 5                                        |
| FBXO21                          | F-box protein 21                                                                                                                    | 5                                        |
| FBXO3                           | F-box protein 3                                                                                                                     | 5                                        |
| FBXO31                          | F-box protein 31                                                                                                                    | 5                                        |

| <b>DOWN REGULATED continued</b> | <b>DOWNREGULATED continued</b>                                                    | <b>DOWN REGULATED continued</b>          |
|---------------------------------|-----------------------------------------------------------------------------------|------------------------------------------|
| <b>Gene Symbol</b>              | <b>Gene Name</b>                                                                  | <b>identified in x out of 10 studies</b> |
| FDFT1                           | farnesyl-diphosphate farnesyltransferase 1                                        | 5                                        |
| FECH                            | ferrochelatase (protoporphyrin)                                                   | 6                                        |
| FGF13                           | fibroblast growth factor 13                                                       | 6                                        |
| FGFR1OP2                        | FGFR1 oncogene partner 2                                                          | 5                                        |
| FHIT                            | fragile histidine triad gene                                                      | 5                                        |
| FHL2                            | four and a half LIM domains 2                                                     | 7                                        |
| FKBP3                           | FK506 binding protein 3, 25kDa                                                    | 6                                        |
| FKBP4                           | FK506 binding protein 4, 59kDa                                                    | 5                                        |
| FMO2                            | flavin containing monooxygenase 2 (non-functional)                                | 6                                        |
| FN3K                            | fructosamine 3 kinase                                                             | 5                                        |
| FNBP1L                          | formin binding protein 1-like                                                     | 5                                        |
| FSD2                            | fibronectin type III and SPRY domain containing 2                                 | 7                                        |
| FXN                             | frataxin                                                                          | 6                                        |
| FXR1                            | fragile X mental retardation, autosomal homolog 1                                 | 5                                        |
| FYCO1                           | FYVE and coiled-coil domain containing 1                                          | 7                                        |
| GALM                            | galactose mutarotase (aldose 1-epimerase)                                         | 5                                        |
| GATA6                           | GATA binding protein 6                                                            | 5                                        |
| GBAS                            | glioblastoma amplified sequence                                                   | 6                                        |
| GCAT                            | glycine C-acetyltransferase (2-amino-3-ketobutyrate coenzyme A ligase)            | 5                                        |
| GCDH                            | glutaryl-Coenzyme A dehydrogenase                                                 | 7                                        |
| GHITM                           | growth hormone inducible transmembrane protein                                    | 5                                        |
| GHR                             | growth hormone receptor                                                           | 5                                        |
| GJA1                            | gap junction protein, alpha 1, 43kDa                                              | 5                                        |
| GLRX5                           | glutaredoxin 5                                                                    | 6                                        |
| GLUD1                           | glutamate dehydrogenase 1                                                         | 5                                        |
| GNA11                           | guanine nucleotide binding protein (G protein), alpha 11 (Gq class)               | 5                                        |
| GOLGA4                          | golgi autoantigen, golgin subfamily a, 4                                          | 5                                        |
| GOT1                            | glutamic-oxaloacetic transaminase 1, soluble (aspartate aminotransferase 1)       | 6                                        |
| GOT2                            | glutamic-oxaloacetic transaminase 2, mitochondrial (aspartate aminotransferase 2) | 6                                        |
| GPR116                          | G protein-coupled receptor 116                                                    | 6                                        |
| GPSM1                           | G-protein signaling modulator 1 (AGS3-like, C. elegans)                           | 6                                        |
| GRB14                           | growth factor receptor-bound protein 14                                           | 5                                        |
| GRSF1                           | G-rich RNA sequence binding factor 1                                              | 7                                        |
| GSTK1                           | glutathione S-transferase kappa 1                                                 | 8                                        |
| GSTM7                           | glutathione S-transferase, mu 7                                                   | 5                                        |
| GTF3C1                          | general transcription factor IIIc, polypeptide 1, alpha 220kDa                    | 5                                        |
| GYS1                            | glycogen synthase 1 (muscle)                                                      | 5                                        |
| HADH                            | hydroxyacyl-Coenzyme A dehydrogenase                                              | 5                                        |



| <b>DOWN REGULATED continued</b> | <b>DOWNREGULATED continued</b>                                                                                                        | <b>DOWN REGULATED continued</b>          |
|---------------------------------|---------------------------------------------------------------------------------------------------------------------------------------|------------------------------------------|
| <b>Gene Symbol</b>              | <b>Gene Name</b>                                                                                                                      | <b>identified in x out of 10 studies</b> |
| HADHA                           | hydroxyacyl-Coenzyme A dehydrogenase/3-ketoacyl-Coenzyme A thiolase/enoyl-Coenzyme A hydratase (trifunctional protein), alpha subunit | 8                                        |
| HADHB                           | hydroxyacyl-Coenzyme A dehydrogenase/3-ketoacyl-Coenzyme A thiolase/enoyl-Coenzyme A hydratase (trifunctional protein), beta subunit  | 6                                        |
| HBS1L                           | HBS1-like ( <i>S. cerevisiae</i> )                                                                                                    | 5                                        |
| HFE2                            | hemochromatosis type 2 (juvenile)                                                                                                     | 5                                        |
| HIBADH                          | 3-hydroxyisobutyrate dehydrogenase                                                                                                    | 5                                        |
| HIBCH                           | 3-hydroxyisobutyryl-Coenzyme A hydrolase                                                                                              | 5                                        |
| HINT2                           | histidine triad nucleotide binding protein 2                                                                                          | 6                                        |
| HINT3                           | histidine triad nucleotide binding protein 3                                                                                          | 6                                        |
| HLF                             | hepatic leukemia factor                                                                                                               | 5                                        |
| HMBS                            | hydroxymethylbilane synthase                                                                                                          | 5                                        |
| HMGN3                           | high mobility group nucleosomal binding domain 3                                                                                      | 5                                        |
| HNMT                            | histamine N-methyltransferase                                                                                                         | 5                                        |
| HNRNPA2B1                       | heterogeneous nuclear ribonucleoprotein A2/B1                                                                                         | 5                                        |
| HOMER1                          | homer homolog 1 ( <i>Drosophila</i> )                                                                                                 | 6                                        |
| HRASLS                          | HRAS-like suppressor                                                                                                                  | 6                                        |
| HRC                             | histidine rich calcium binding protein                                                                                                | 6                                        |
| HSD17B10                        | hydroxysteroid (17-beta) dehydrogenase 10                                                                                             | 5                                        |
| HSD17B4                         | hydroxysteroid (17-beta) dehydrogenase 4                                                                                              | 5                                        |
| HSPA9                           | heat shock 70kDa protein 9 (mortalin)                                                                                                 | 5                                        |
| HSPB3                           | heat shock 27kDa protein 3                                                                                                            | 5                                        |
| ICT1                            | immature colon carcinoma transcript 1                                                                                                 | 7                                        |
| IDE                             | insulin-degrading enzyme                                                                                                              | 5                                        |
| IDH2                            | isocitrate dehydrogenase 2 (NADP+), mitochondrial                                                                                     | 5                                        |
| IDH3A                           | isocitrate dehydrogenase 3 (NAD+) alpha                                                                                               | 8                                        |
| IDH3B                           | isocitrate dehydrogenase 3 (NAD+) beta                                                                                                | 9                                        |
| IDH3G                           | isocitrate dehydrogenase 3 (NAD+) gamma                                                                                               | 7                                        |
| IFT81                           | intraflagellar transport 81 homolog ( <i>Chlamydomonas</i> )                                                                          | 5                                        |
| IMMT                            | inner membrane protein, mitochondrial (mitofilin)                                                                                     | 7                                        |
| IQWD1                           | IQ motif and WD repeats 1                                                                                                             | 6                                        |
| ISCU                            | iron-sulfur cluster scaffold homolog ( <i>E. coli</i> )                                                                               | 6                                        |
| IVD                             | isovaleryl Coenzyme A dehydrogenase                                                                                                   | 8                                        |
| IVNS1ABP                        | influenza virus NS1A binding protein                                                                                                  | 6                                        |
| JAM2                            | junctional adhesion molecule 2                                                                                                        | 6                                        |
| KCNJ8                           | potassium inwardly-rectifying channel, subfamily J, member 8                                                                          | 7                                        |
| KCNN2                           | potassium intermediate/small conductance calcium-activated channel, subfamily N, member 2                                             | 5                                        |
| KHDRBS1                         | KH domain containing, RNA binding, signal transduction associated 1                                                                   | 5                                        |
| KLHDC2                          | kelch domain containing 2                                                                                                             | 6                                        |

| <b>DOWN REGULATED continued</b> | <b>DOWNREGULATED continued</b>                                                                          | <b>DOWN REGULATED continued</b>          |
|---------------------------------|---------------------------------------------------------------------------------------------------------|------------------------------------------|
| <b>Gene Symbol</b>              | <b>Gene Name</b>                                                                                        | <b>identified in x out of 10 studies</b> |
| KLHL24                          | kelch-like 24 (Drosophila)                                                                              | 5                                        |
| KLHL7                           | kelch-like 7 (Drosophila)                                                                               | 6                                        |
| LANCL1                          | LanC lantibiotic synthetase component C-like 1 (bacterial)                                              | 5                                        |
| LAPTM4B                         | lysosomal protein transmembrane 4 beta                                                                  | 5                                        |
| LARP5                           | La ribonucleoprotein domain family, member 4B                                                           | 5                                        |
| LDHB                            | lactate dehydrogenase B                                                                                 | 6                                        |
| LDHD                            | lactate dehydrogenase D                                                                                 | 7                                        |
| LGTN                            | ligatin                                                                                                 | 5                                        |
| LIAS                            | lipoic acid synthetase                                                                                  | 6                                        |
| LMAN2L                          | lectin, mannose-binding 2-like                                                                          | 5                                        |
| LMO7                            | LIM domain 7                                                                                            | 6                                        |
| LPIN1                           | lipin 1                                                                                                 | 6                                        |
| LRRC20                          | leucine rich repeat containing 20                                                                       | 5                                        |
| LRRC39                          | leucine rich repeat containing 39                                                                       | 6                                        |
| LUC7L2                          | LUC7-like 2 (S. cerevisiae)                                                                             | 6                                        |
| LZIC                            | leucine zipper and CTNNBIP1 domain containing                                                           | 5                                        |
| MACROD1                         | MACRO domain containing 1                                                                               | 5                                        |
| MAP3K4                          | mitogen-activated protein kinase kinase kinase 4                                                        | 5                                        |
| MATR3                           | matrin 3                                                                                                | 5                                        |
| MCCC2                           | methylcrotonoyl-Coenzyme A carboxylase 2 (beta)                                                         | 7                                        |
| MDH1                            | malate dehydrogenase 1, NAD (soluble)                                                                   | 6                                        |
| MDH2                            | malate dehydrogenase 2, NAD (mitochondrial)                                                             | 6                                        |
| ME1                             | malic enzyme 1, NADP(+)-dependent, cytosolic                                                            | 5                                        |
| ME3                             | malic enzyme 3, NADP(+)-dependent, mitochondrial                                                        | 6                                        |
| MEF2A                           | myocyte enhancer factor 2A                                                                              | 7                                        |
| MEIS2                           | Meis homeobox 2                                                                                         | 7                                        |
| METT11D1                        | methyltransferase 11 domain containing 1; similar to methyltransferase 11 domain containing 1 isoform 2 | 5                                        |
| METTL5                          | methyltransferase like 5                                                                                | 5                                        |
| MFN1                            | mitofusin 1                                                                                             | 6                                        |
| MFN2                            | mitofusin 2                                                                                             | 5                                        |
| MGST3                           | microsomal glutathione S-transferase 3                                                                  | 5                                        |
| MITF                            | microphthalmia-associated transcription factor                                                          | 8                                        |
| MKKS                            | McKusick-Kaufman syndrome                                                                               | 5                                        |
| MLF1                            | myeloid leukemia factor 1                                                                               | 5                                        |
| MLYCD                           | malonyl-CoA decarboxylase                                                                               | 6                                        |
| MMACHC                          | methylmalonic aciduria (cobalamin deficiency) cblC type, with homocystinuria                            | 5                                        |
| MOCS2                           | molybdenum cofactor synthesis 2                                                                         | 7                                        |
| MPPED2                          | metallophosphoesterase domain containing 2                                                              | 6                                        |
| MRPL11                          | mitochondrial ribosomal protein L11                                                                     | 5                                        |
| MRPL12                          | mitochondrial ribosomal protein L12                                                                     | 5                                        |
| MRPL13                          | mitochondrial ribosomal protein L13                                                                     | 5                                        |
| MRPL15                          | mitochondrial ribosomal protein L15                                                                     | 7                                        |

| <b>DOWN REGULATED continued</b> | <b>DOWNREGULATED continued</b>                                | <b>DOWN REGULATED continued</b>          |
|---------------------------------|---------------------------------------------------------------|------------------------------------------|
| <b>Gene Symbol</b>              | <b>Gene Name</b>                                              | <b>identified in x out of 10 studies</b> |
| MRPL18                          | mitochondrial ribosomal protein L18                           | 5                                        |
| MRPL19                          | mitochondrial ribosomal protein L19                           | 5                                        |
| MRPL2                           | mitochondrial ribosomal protein L2                            | 5                                        |
| MRPL22                          | mitochondrial ribosomal protein L22                           | 6                                        |
| MRPL3                           | mitochondrial ribosomal protein L3                            | 5                                        |
| MRPL35                          | mitochondrial ribosomal protein L35                           | 5                                        |
| MRPL40                          | mitochondrial ribosomal protein L40                           | 6                                        |
| MRPL44                          | mitochondrial ribosomal protein L44                           | 6                                        |
| MRPL45                          | mitochondrial ribosomal protein L45                           | 6                                        |
| MRPL46                          | mitochondrial ribosomal protein L46                           | 6                                        |
| MRPL47                          | mitochondrial ribosomal protein L47                           | 7                                        |
| MRPL48                          | mitochondrial ribosomal protein L48                           | 6                                        |
| MRPL51                          | mitochondrial ribosomal protein L51                           | 5                                        |
| MRPS14                          | mitochondrial ribosomal protein S14                           | 6                                        |
| MRPS15                          | mitochondrial ribosomal protein S15                           | 6                                        |
| MRPS17                          | mitochondrial ribosomal protein S17                           | 5                                        |
| MRPS18C                         | mitochondrial ribosomal protein S18C                          | 6                                        |
| MRPS23                          | mitochondrial ribosomal protein S23                           | 5                                        |
| MRPS24                          | mitochondrial ribosomal protein S24                           | 7                                        |
| MRPS25                          | mitochondrial ribosomal protein S25                           | 6                                        |
| MRPS31                          | mitochondrial ribosomal protein S31                           | 6                                        |
| MRPS35                          | mitochondrial ribosomal protein S35                           | 5                                        |
| MRPS36                          | mitochondrial ribosomal protein S36                           | 6                                        |
| MRPS5                           | mitochondrial ribosomal protein S5                            | 5                                        |
| MRPS6                           | mitochondrial ribosomal protein S6                            | 6                                        |
| MRPS9                           | mitochondrial ribosomal protein S9                            | 5                                        |
| MSI2                            | musashi homolog 2 (Drosophila)                                | 6                                        |
| MTCH2                           | mitochondrial carrier homolog 2 (C. elegans)                  | 5                                        |
| MTERFD3                         | MTERF domain containing 3                                     | 5                                        |
| MTIF2                           | mitochondrial translational initiation factor 2               | 6                                        |
| MTSS1                           | metastasis suppressor 1                                       | 5                                        |
| MTX1                            | metaxin 1                                                     | 5                                        |
| MTX2                            | metaxin 2                                                     | 5                                        |
| MUT                             | methylmalonyl Coenzyme A mutase                               | 7                                        |
| MYO10                           | myosin X                                                      | 5                                        |
| MYOM2                           | myomesin (M-protein) 2, 165kDa                                | 6                                        |
| MYOZ2                           | myozenin 2                                                    | 5                                        |
| NCOR1                           | nuclear receptor co-repressor 1                               | 6                                        |
| NDUFA1                          | NADH dehydrogenase (ubiquinone) 1 alpha subcomplex, 1, 7.5kDa | 6                                        |
| NDUFA10                         | NADH dehydrogenase (ubiquinone) 1 alpha subcomplex, 10, 42kDa | 5                                        |
| NDUFA12                         | NADH dehydrogenase (ubiquinone) 1 alpha subcomplex, 12        | 6                                        |

| <b>DOWN REGULATED continued</b> | <b>DOWNREGULATED continued</b>                                                    | <b>DOWN REGULATED continued</b>          |
|---------------------------------|-----------------------------------------------------------------------------------|------------------------------------------|
| <b>Gene Symbol</b>              | <b>Gene Name</b>                                                                  | <b>identified in x out of 10 studies</b> |
| NDUFA2                          | NADH dehydrogenase (ubiquinone) 1 alpha subcomplex, 2, 8kDa                       | 7                                        |
| NDUFA3                          | NADH dehydrogenase (ubiquinone) 1 alpha subcomplex, 3, 9kDa                       | 6                                        |
| NDUFA4                          | NADH dehydrogenase (ubiquinone) 1 alpha subcomplex, 4, 9kDa                       | 5                                        |
| NDUFA5                          | NADH dehydrogenase (ubiquinone) 1 alpha subcomplex, 5, 13kDa                      | 7                                        |
| NDUFA7                          | NADH dehydrogenase (ubiquinone) 1 alpha subcomplex, 7, 14.5kDa                    | 7                                        |
| NDUFA8                          | NADH dehydrogenase (ubiquinone) 1 alpha subcomplex, 8, 19kDa                      | 5                                        |
| NDUFA9                          | NADH dehydrogenase (ubiquinone) 1 alpha subcomplex, 9, 39kDa                      | 8                                        |
| NDUFAB1                         | NADH dehydrogenase (ubiquinone) 1, alpha/beta subcomplex, 1, 8kDa                 | 7                                        |
| NDUFAF1                         | NADH dehydrogenase (ubiquinone) 1 alpha subcomplex, assembly factor 1             | 7                                        |
| NDUFB10                         | NADH dehydrogenase (ubiquinone) 1 beta subcomplex, 10, 22kDa                      | 7                                        |
| NDUFB11                         | NADH dehydrogenase (ubiquinone) 1 beta subcomplex, 11, 17.3kDa                    | 8                                        |
| NDUFB2                          | NADH dehydrogenase (ubiquinone) 1 beta subcomplex, 2, 8kDa                        | 5                                        |
| NDUFB6                          | NADH dehydrogenase (ubiquinone) 1 beta subcomplex, 6, 17kDa                       | 5                                        |
| NDUFB7                          | NADH dehydrogenase (ubiquinone) 1 beta subcomplex, 7, 18kDa                       | 5                                        |
| NDUFB8                          | NADH dehydrogenase (ubiquinone) 1 beta subcomplex, 8, 19kDa                       | 7                                        |
| NDUFB9                          | NADH dehydrogenase (ubiquinone) 1 beta subcomplex, 9, 22kDa                       | 6                                        |
| NDUFC1                          | NADH dehydrogenase (ubiquinone) 1, subcomplex unknown, 1, 6kDa                    | 5                                        |
| NDUFS1                          | NADH dehydrogenase (ubiquinone) Fe-S protein 1, 75kDa (NADH-coenzyme Q reductase) | 7                                        |
| NDUFS2                          | NADH dehydrogenase (ubiquinone) Fe-S protein 2, 49kDa (NADH-coenzyme Q reductase) | 7                                        |
| NDUFS3                          | NADH dehydrogenase (ubiquinone) Fe-S protein 3, 30kDa (NADH-coenzyme Q reductase) | 9                                        |
| NDUFS4                          | NADH dehydrogenase (ubiquinone) Fe-S protein 4, 18kDa (NADH-coenzyme Q reductase) | 9                                        |
| NDUFS6                          | NADH dehydrogenase (ubiquinone) Fe-S protein 6, 13kDa (NADH-coenzyme Q reductase) | 7                                        |
| NDUFS7                          | NADH dehydrogenase (ubiquinone) Fe-S protein 7, 20kDa (NADH-coenzyme Q reductase) | 7                                        |
| NDUFS8                          | NADH dehydrogenase (ubiquinone) Fe-S protein 8, 23kDa (NADH-coenzyme Q reductase) | 6                                        |
| NDUFV1                          | NADH dehydrogenase (ubiquinone) flavoprotein 1, 51kDa                             | 9                                        |

| <b>DOWN REGULATED continued</b> | <b>DOWNREGULATED continued</b>                                                                                           | <b>DOWN REGULATED continued</b>          |
|---------------------------------|--------------------------------------------------------------------------------------------------------------------------|------------------------------------------|
| <b>Gene Symbol</b>              | <b>Gene Name</b>                                                                                                         | <b>identified in x out of 10 studies</b> |
| NDUFV2                          | NADH dehydrogenase (ubiquinone) flavoprotein 2, 24kDa                                                                    | 8                                        |
| NFS1                            | NFS1 nitrogen fixation 1 homolog (S. cerevisiae)                                                                         | 7                                        |
| NFYC                            | nuclear transcription factor Y, gamma                                                                                    | 5                                        |
| NKIRAS2                         | NFKB inhibitor interacting Ras-like 2                                                                                    | 5                                        |
| NMNAT1                          | nicotinamide nucleotide adenylyltransferase 1                                                                            | 5                                        |
| NNT                             | nicotinamide nucleotide transhydrogenase                                                                                 | 8                                        |
| NR2F6                           | nuclear receptor subfamily 2, group F, member 6                                                                          | 5                                        |
| NR3C1                           | nuclear receptor subfamily 3, group C, member 1 (glucocorticoid receptor)                                                | 5                                        |
| NR3C2                           | nuclear receptor subfamily 3, group C, member 2                                                                          | 5                                        |
| NRP1                            | neuropilin 1                                                                                                             | 5                                        |
| NSMCE1                          | non-SMC element 1 homolog (S. cerevisiae)                                                                                | 5                                        |
| NUBPL                           | nucleotide binding protein-like                                                                                          | 5                                        |
| NUDT4                           | nudix (nucleoside diphosphate linked moiety X)-type motif 4                                                              | 5                                        |
| NUDT6                           | nudix (nucleoside diphosphate linked moiety X)-type motif 6                                                              | 5                                        |
| NUDT7                           | nudix (nucleoside diphosphate linked moiety X)-type motif 7                                                              | 5                                        |
| OCIAD1                          | OCIA domain containing 1                                                                                                 | 5                                        |
| OGT                             | O-linked N-acetylglucosamine (GlcNAc) transferase (UDP-N-acetylglucosamine:polypeptide-N-acetylglucosaminyl transferase) | 5                                        |
| OMA1                            | OMA1 homolog, zinc metallopeptidase (S. cerevisiae)                                                                      | 5                                        |
| OPTN                            | optineurin                                                                                                               | 5                                        |
| OXA1L                           | oxidase (cytochrome c) assembly 1-like                                                                                   | 5                                        |
| OXCT1                           | 3-oxoacid CoA transferase 1                                                                                              | 6                                        |
| OXR1                            | oxidation resistance 1                                                                                                   | 5                                        |
| PANK1                           | pantothenate kinase 1                                                                                                    | 5                                        |
| PAPD1                           | mitochondrial poly(A) polymerase                                                                                         | 6                                        |
| PAQR9                           | progesterin and adipoQ receptor family member IX                                                                         | 5                                        |
| PARP1                           | poly (ADP-ribose) polymerase 1                                                                                           | 7                                        |
| PCCA                            | propionyl Coenzyme A carboxylase, alpha polypeptide                                                                      | 6                                        |
| PCCB                            | propionyl Coenzyme A carboxylase, beta polypeptide                                                                       | 5                                        |
| PCDH7                           | protocadherin 7                                                                                                          | 6                                        |
| PCM1                            | pericentriolar material 1                                                                                                | 5                                        |
| PCMT1                           | protein-L-isoaspartate (D-aspartate) O-methyltransferase                                                                 | 6                                        |
| PCMTD2                          | protein-L-isoaspartate (D-aspartate) O-methyltransferase domain containing 2                                             | 5                                        |
| PCTP                            | phosphatidylcholine transfer protein                                                                                     | 5                                        |
| PCYT2                           | phosphate cytidyltransferase 2, ethanolamine                                                                             | 5                                        |
| PDE1C                           | phosphodiesterase 1C, calmodulin-dependent 70kDa                                                                         | 6                                        |
| PDHA1                           | pyruvate dehydrogenase (lipoamide) alpha 1                                                                               | 8                                        |
| PDHB                            | pyruvate dehydrogenase (lipoamide) beta                                                                                  | 6                                        |
| PDK2                            | pyruvate dehydrogenase kinase, isozyme 2                                                                                 | 6                                        |

| <b>DOWN REGULATED continued</b> | <b>DOWNREGULATED continued</b>                                        | <b>DOWN REGULATED continued</b>          |
|---------------------------------|-----------------------------------------------------------------------|------------------------------------------|
| <b>Gene Symbol</b>              | <b>Gene Name</b>                                                      | <b>identified in x out of 10 studies</b> |
| PECI                            | peroxisomal D3,D2-enoyl-CoA isomerase                                 | 8                                        |
| PER3                            | period homolog 3 (Drosophila)                                         | 5                                        |
| PERP                            | PERP, TP53 apoptosis effector                                         | 5                                        |
| PET112L                         | PET112-like (yeast)                                                   | 5                                        |
| PEX1                            | peroxisomal biogenesis factor 1                                       | 5                                        |
| PEX12                           | peroxisomal biogenesis factor 12                                      | 5                                        |
| PEX7                            | peroxisomal biogenesis factor 7                                       | 7                                        |
| PFKFB2                          | 6-phosphofructo-2-kinase/fructose-2,6-biphosphatase 2                 | 5                                        |
| PFKM                            | phosphofructokinase, muscle                                           | 7                                        |
| PGAM2                           | phosphoglycerate mutase 2 (muscle)                                    | 6                                        |
| PGK1                            | phosphoglycerate kinase 1                                             | 6                                        |
| PGM1                            | phosphoglucomutase 1                                                  | 5                                        |
| PHB                             | prohibitin                                                            | 5                                        |
| PHB2                            | prohibitin 2                                                          | 6                                        |
| PHYH                            | phytanoyl-CoA 2-hydroxylase                                           | 6                                        |
| PITRM1                          | pitrilysin metallopeptidase 1                                         | 5                                        |
| PKP4                            | plakophilin 4                                                         | 6                                        |
| PLA2G5                          | phospholipase A2, group V                                             | 5                                        |
| PLCL1                           | phospholipase C-like 1                                                | 5                                        |
| PLEKHA5                         | pleckstrin homology domain containing, family A member 5              | 5                                        |
| PLN                             | phospholamban                                                         | 5                                        |
| PMPCB                           | peptidase (mitochondrial processing) beta                             | 6                                        |
| POLB                            | polymerase (DNA directed), beta                                       | 6                                        |
| POLRMT                          | polymerase (RNA) mitochondrial (DNA directed)                         | 7                                        |
| POPDC2                          | popeye domain containing 2                                            | 5                                        |
| PPARGC1A                        | peroxisome proliferator-activated receptor gamma, coactivator 1 alpha | 8                                        |
| PPL                             | periplakin                                                            | 5                                        |
| PPP1R3A                         | protein phosphatase 1, regulatory (inhibitor) subunit 3A              | 5                                        |
| PPTC7                           | PTC7 protein phosphatase homolog (S. cerevisiae)                      | 5                                        |
| PRDX2                           | peroxiredoxin 2                                                       | 5                                        |
| PRKACA                          | protein kinase, cAMP-dependent, catalytic, alpha                      | 5                                        |
| PROSC                           | proline synthetase co-transcribed homolog (bacterial)                 | 5                                        |
| PSMD7                           | proteasome (prosome, macropain) 26S subunit, non-ATPase, 7            | 5                                        |
| PSME1                           | proteasome (prosome, macropain) activator subunit 1 (PA28 alpha)      | 5                                        |
| PSME4                           | proteasome (prosome, macropain) activator subunit 4                   | 5                                        |
| PTCD3                           | Pentatricopeptide repeat domain 3                                     | 5                                        |
| PTPN3                           | protein tyrosine phosphatase, non-receptor type 3                     | 5                                        |
| PTPRK                           | protein tyrosine phosphatase, receptor type, K                        | 5                                        |
| PXMP2                           | hypothetical LOC100129532; peroxisomal membrane protein 2, 22kDa      | 8                                        |

| <b>DOWN REGULATED continued</b> | <b>DOWNREGULATED continued</b>                                                   | <b>DOWN REGULATED continued</b>          |
|---------------------------------|----------------------------------------------------------------------------------|------------------------------------------|
| <b>Gene Symbol</b>              | <b>Gene Name</b>                                                                 | <b>identified in x out of 10 studies</b> |
| PYGM                            | phosphorylase, glycogen, muscle                                                  | 7                                        |
| QDPR                            | quinoid dihydropteridine reductase                                               | 8                                        |
| QRSL1                           | glutaminyl-tRNA synthase (glutamine-hydrolyzing)-like 1                          | 6                                        |
| RAB12                           | RAB12, member RAS oncogene family                                                | 5                                        |
| RAB14                           | RAB14, member RAS oncogene family                                                | 6                                        |
| RABGAP1L                        | RAB GTPase activating protein 1-like                                             | 7                                        |
| RAF1                            | v-raf-1 murine leukemia viral oncogene homolog 1                                 | 5                                        |
| RAP1A                           | RAP1A, member of RAS oncogene family                                             | 5                                        |
| RAPGEF2                         | Rap guanine nucleotide exchange factor (GEF) 2; similar to RAPGEF2 protein       | 6                                        |
| RASD2                           | RASD family, member 2                                                            | 5                                        |
| RBBP6                           | retinoblastoma binding protein 6                                                 | 5                                        |
| RBM20                           | RNA binding motif protein 20                                                     | 5                                        |
| RBMX                            | RNA binding motif protein, X-linked                                              | 7                                        |
| RBX1                            | ring-box 1                                                                       | 6                                        |
| RCAN2                           | regulator of calcineurin 2                                                       | 6                                        |
| RCHY1                           | ring finger and CHY zinc finger domain containing 1                              | 5                                        |
| RCSD1                           | RCSD domain containing 1                                                         | 5                                        |
| RDH14                           | retinol dehydrogenase 14 (all-trans/9-cis/11-cis); 5'-nucleotidase, cytosolic IB | 7                                        |
| RMND1                           | required for meiotic nuclear division 1 homolog (S. cerevisiae)                  | 6                                        |
| RNF10                           | ring finger protein 10                                                           | 5                                        |
| RNF5                            | ring finger protein 5; ring finger protein 5 pseudogene 1                        | 6                                        |
| RPAIN                           | RPA interacting protein                                                          | 5                                        |
| RPL3L                           | ribosomal protein L3-like                                                        | 6                                        |
| RREB1                           | ras responsive element binding protein 1                                         | 5                                        |
| RTN2                            | reticulum 2                                                                      | 6                                        |
| RTN4IP1                         | reticulum 4 interacting protein 1                                                | 5                                        |
| RXRG                            | retinoid X receptor, gamma                                                       | 6                                        |
| RYR2                            | ryanodine receptor 2 (cardiac)                                                   | 8                                        |
| SAMM50                          | sorting and assembly machinery component 50 homolog (S. cerevisiae)              | 6                                        |
| SATB1                           | SATB homeobox 1                                                                  | 5                                        |
| SCHIP1                          | schwannomin interacting protein 1                                                | 7                                        |
| SDHA                            | succinate dehydrogenase complex, subunit A, flavoprotein (Fp)                    | 6                                        |
| SDHB                            | succinate dehydrogenase complex, subunit B, iron sulfur (Ip)                     | 8                                        |
| SDHC                            | succinate dehydrogenase complex, subunit C, integral membrane protein, 15kDa     | 5                                        |
| SDHD                            | succinate dehydrogenase complex, subunit D, integral membrane protein            | 6                                        |
| SDPR                            | serum deprivation response (phosphatidylserine binding protein)                  | 5                                        |



| <b>DOWN REGULATED continued</b> | <b>DOWNREGULATED continued</b>                                                           | <b>DOWN REGULATED continued</b>          |
|---------------------------------|------------------------------------------------------------------------------------------|------------------------------------------|
| <b>Gene Symbol</b>              | <b>Gene Name</b>                                                                         | <b>identified in x out of 10 studies</b> |
| SELENBP1                        | selenium binding protein 1                                                               | 6                                        |
| SGCA                            | sarcoglycan, alpha (50kDa dystrophin-associated glycoprotein)                            | 5                                        |
| SH3KBP1                         | SH3-domain kinase binding protein 1                                                      | 8                                        |
| SIRT3                           | sirtuin (silent mating type information regulation 2 homolog) 3 ( <i>S. cerevisiae</i> ) | 6                                        |
| SIRT5                           | sirtuin (silent mating type information regulation 2 homolog) 5 ( <i>S. cerevisiae</i> ) | 9                                        |
| SLC22A5                         | solute carrier family 22 (organic cation/carnitine transporter), member 5                | 5                                        |
| SLC25A11                        | solute carrier family 25 (mitochondrial carrier; oxoglutarate carrier), member 11        | 5                                        |
| SLC25A12                        | solute carrier family 25 (mitochondrial carrier, Aralar), member 12                      | 8                                        |
| SLC25A20                        | solute carrier family 25 (carnitine/acylcarnitine translocase), member 20                | 6                                        |
| SLC25A29                        | solute carrier family 25, member 29                                                      | 5                                        |
| SLC25A3                         | solute carrier family 25 (mitochondrial carrier; phosphate carrier), member 3            | 8                                        |
| SLC27A1                         | solute carrier family 27 (fatty acid transporter), member 1                              | 6                                        |
| SLC4A3                          | solute carrier family 4, anion exchanger, member 3                                       | 6                                        |
| SMTN                            | smoothelin                                                                               | 6                                        |
| SMYD2                           | SET and MYND domain containing 2                                                         | 6                                        |
| SNN                             | stannin                                                                                  | 5                                        |
| SORBS1                          | sorbin and SH3 domain containing 1                                                       | 5                                        |
| SORD                            | sorbitol dehydrogenase                                                                   | 6                                        |
| SPAG7                           | sperm associated antigen 7                                                               | 5                                        |
| SPATA7                          | spermatogenesis associated 7                                                             | 5                                        |
| SPG7                            | spastic paraplegia 7 (pure and complicated autosomal recessive)                          | 5                                        |
| SQRDL                           | sulfide quinone reductase-like (yeast)                                                   | 5                                        |
| SRRM1                           | serine/arginine repetitive matrix 1                                                      | 5                                        |
| STARD7                          | StAR-related lipid transfer (START) domain containing 7                                  | 6                                        |
| STK39                           | serine threonine kinase 39 (STE20/SPS1 homolog, yeast)                                   | 5                                        |
| SUCLA2                          | succinate-CoA ligase, ADP-forming, beta subunit                                          | 9                                        |
| SUCLG1                          | succinate-CoA ligase, alpha subunit                                                      | 8                                        |
| SUCLG2                          | similar to suchb; succinate-CoA ligase, GDP-forming, beta subunit                        | 5                                        |
| SUOX                            | sulfite oxidase                                                                          | 7                                        |
| SUPV3L1                         | suppressor of var1, 3-like 1 ( <i>S. cerevisiae</i> )                                    | 5                                        |
| SYNJ2                           | synaptojanin 2                                                                           | 6                                        |
| TACC2                           | transforming, acidic coiled-coil containing protein 2                                    | 6                                        |
| TBCE                            | tubulin folding cofactor E                                                               | 5                                        |
| TCEA3                           | transcription elongation factor A (SII), 3                                               | 6                                        |
| TFDP2                           | transcription factor Dp-2 (E2F dimerization partner 2)                                   | 5                                        |



| <b>DOWN REGULATED continued</b> | <b>DOWNREGULATED continued</b>                                                                                                              | <b>DOWN REGULATED continued</b>          |
|---------------------------------|---------------------------------------------------------------------------------------------------------------------------------------------|------------------------------------------|
| <b>Gene Symbol</b>              | <b>Gene Name</b>                                                                                                                            | <b>identified in x out of 10 studies</b> |
| THEM2                           | acyl-CoA thioesterase 13                                                                                                                    | 6                                        |
| TIMM44                          | translocase of inner mitochondrial membrane 44 homolog (yeast)                                                                              | 5                                        |
| TIMM8B                          | similar to translocase of inner mitochondrial membrane 8 homolog B; translocase of inner mitochondrial membrane 8 homolog B (yeast)         | 5                                        |
| TM2D2                           | TM2 domain containing 2                                                                                                                     | 5                                        |
| TMCC1                           | transmembrane and coiled-coil domain family 1                                                                                               | 5                                        |
| TMEM143                         | transmembrane protein 143                                                                                                                   | 5                                        |
| TMEM50B                         | transmembrane protein 50B                                                                                                                   | 6                                        |
| TMLHE                           | trimethyllysine hydroxylase, epsilon                                                                                                        | 5                                        |
| TNNI3                           | troponin I type 3 (cardiac)                                                                                                                 | 5                                        |
| TNNT2                           | troponin T type 2 (cardiac)                                                                                                                 | 5                                        |
| TRAP1                           | TNF receptor-associated protein 1                                                                                                           | 6                                        |
| TRDN                            | triadin                                                                                                                                     | 5                                        |
| TRIM45                          | tripartite motif-containing 45                                                                                                              | 5                                        |
| TRIM63                          | tripartite motif-containing 63                                                                                                              | 5                                        |
| TSC1                            | tuberous sclerosis 1                                                                                                                        | 5                                        |
| TSFM                            | Ts translation elongation factor, mitochondrial                                                                                             | 5                                        |
| TSPAN13                         | tetraspanin 13                                                                                                                              | 5                                        |
| TTC15                           | tetratricopeptide repeat domain 15                                                                                                          | 5                                        |
| TUFM                            | Tu translation elongation factor, mitochondrial                                                                                             | 6                                        |
| TUSC4                           | tumor suppressor candidate 4                                                                                                                | 6                                        |
| UBE2B                           | ubiquitin-conjugating enzyme E2B (RAD6 homolog)                                                                                             | 7                                        |
| UBE2D2                          | ubiquitin-conjugating enzyme E2D 2 (UBC4/5 homolog, yeast)                                                                                  | 5                                        |
| UBE4A                           | ubiquitination factor E4A (UFD2 homolog, yeast)                                                                                             | 7                                        |
| UBQLN2                          | ubiquilin 2                                                                                                                                 | 5                                        |
| UCKL1                           | uridine-cytidine kinase 1-like 1                                                                                                            | 5                                        |
| UQCR                            | ubiquinol-cytochrome c reductase, 6.4kDa subunit                                                                                            | 5                                        |
| UQCRC2                          | ubiquinol-cytochrome c reductase core protein II                                                                                            | 6                                        |
| UQCRC1                          | ubiquinol-cytochrome c reductase, Rieske iron-sulfur polypeptide-like 1; ubiquinol-cytochrome c reductase, Rieske iron-sulfur polypeptide 1 | 5                                        |
| UROD                            | uroporphyrinogen decarboxylase                                                                                                              | 6                                        |
| USP2                            | ubiquitin specific peptidase 2                                                                                                              | 5                                        |
| USP24                           | ubiquitin specific peptidase 24                                                                                                             | 5                                        |
| USP7                            | ubiquitin specific peptidase 7 (herpes virus-associated)                                                                                    | 5                                        |
| VAPB                            | VAMP (vesicle-associated membrane protein)-associated protein B and C                                                                       | 5                                        |
| VARS2                           | valyl-tRNA synthetase 2, mitochondrial (putative)                                                                                           | 5                                        |
| VDAC1                           | voltage-dependent anion channel 1; similar to voltage-dependent anion channel 1                                                             | 5                                        |
| VDAC2                           | voltage-dependent anion channel 2                                                                                                           | 6                                        |
| VDAC3                           | voltage-dependent anion channel 3                                                                                                           | 6                                        |

| <b>DOWN REGULATED continued</b> | <b>DOWNREGULATED continued</b>                                                                                                                                                                       | <b>DOWN REGULATED continued</b>          |
|---------------------------------|------------------------------------------------------------------------------------------------------------------------------------------------------------------------------------------------------|------------------------------------------|
| <b>Gene Symbol</b>              | <b>Gene Name</b>                                                                                                                                                                                     | <b>identified in x out of 10 studies</b> |
| VLDLR                           | very low density lipoprotein receptor                                                                                                                                                                | 5                                        |
| WARS2                           | tryptophanyl tRNA synthetase 2, mitochondrial                                                                                                                                                        | 5                                        |
| WBP11                           | WW domain binding protein 11                                                                                                                                                                         | 5                                        |
| WDR13                           | WD repeat domain 13                                                                                                                                                                                  | 5                                        |
| WDR37                           | WD repeat domain 37                                                                                                                                                                                  | 5                                        |
| WRB                             | tryptophan rich basic protein                                                                                                                                                                        | 5                                        |
| WWP1                            | WW domain containing E3 ubiquitin protein ligase 1                                                                                                                                                   | 7                                        |
| XK                              | X-linked Kx blood group (McLeod syndrome)                                                                                                                                                            | 5                                        |
| YEATS4                          | YEATS domain containing 4                                                                                                                                                                            | 5                                        |
| YWHAE                           | similar to 14-3-3 protein epsilon (14-3-3E) (Mitochondrial import stimulation factor L subunit) (MSF L); tyrosine 3-monooxygenase/tryptophan 5-monooxygenase activation protein, epsilon polypeptide | 5                                        |
| ZADH2                           | zinc binding alcohol dehydrogenase domain containing 2                                                                                                                                               | 7                                        |
| ZFYVE21                         | zinc finger, FYVE domain containing 21                                                                                                                                                               | 6                                        |
| ZYG11B                          | zyg-11 homolog B (C. elegans)                                                                                                                                                                        | 5                                        |
| ZZEF1                           | zinc finger, ZZ-type with EF-hand domain 1                                                                                                                                                           | 5                                        |

Supplemental Figure 1

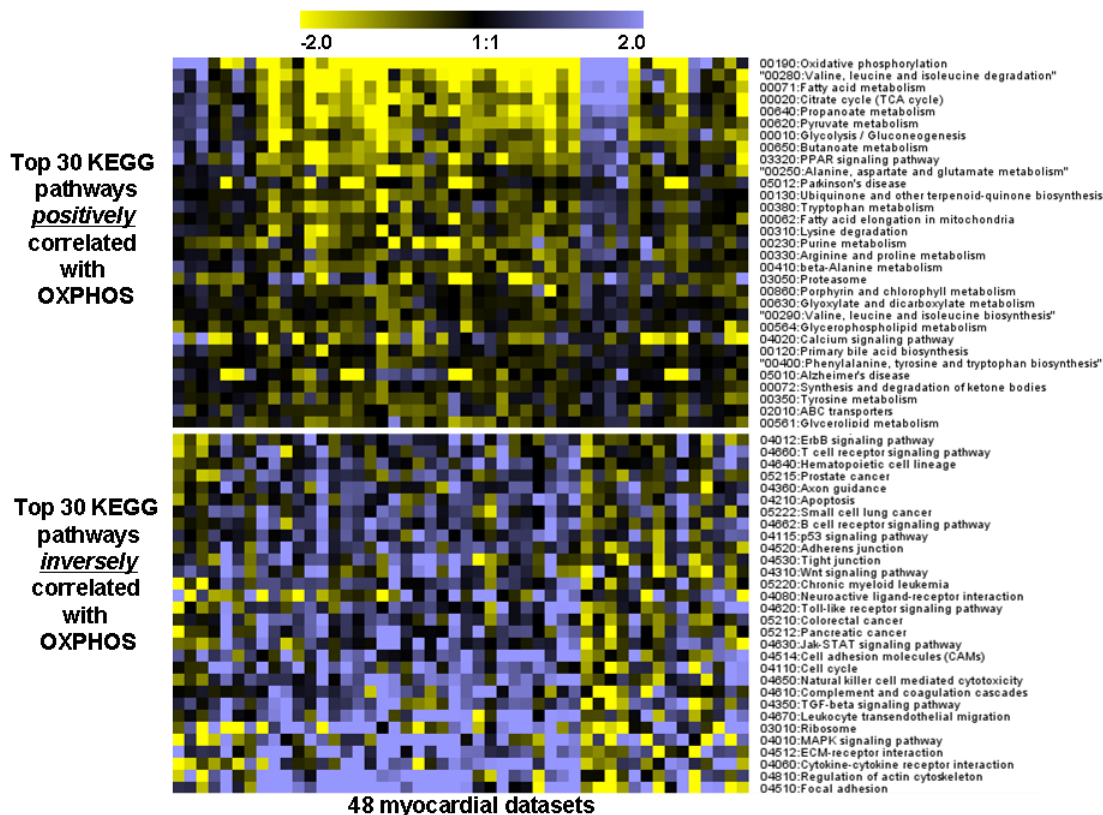

**Supplemental Figure 1. Top 30 KEGG pathways positively and negatively correlated with the KEGG pathway of oxidative phosphorylation.** The net expression of a KEGG pathway (number of up- *minus* downregulated genes within a study in relation to total number of genes per given KEGG pathway, see also Figures 1 and 2) is color-coded with yellow and blue representing low and high expression of the pathway, respectively. The KEGG pathways were sorted according to their similarity of gene expression to "oxidative phosphorylation" which is represented by the top row (OXPHOS). Across a wide range of diverse myocardial gene expression datasets, metabolic and biosynthesis pathways were consistently positively correlated to each other and negatively correlated with the expression of cell signaling pathways. It is of interest to note that the tight regulation extended beyond KEGG pathways important for metabolic and signaling functions, as evident by the positive correlation between OXPHOS and transcripts belonging to the "proteasome". In contrast, structural components important for cell-cell contact (e.g. "cell adhesion molecules", "tight junctions", "adherens junctions", "focal adhesion") and ribosome were negatively correlated with OXPHOS.

Supplemental Figure 2

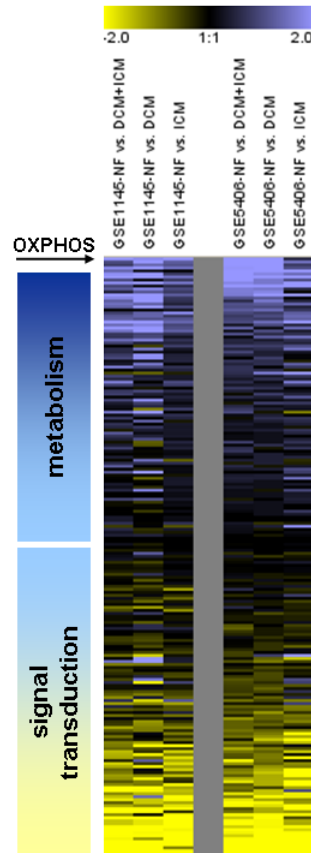

**Supplemental Figure 2. Reciprocal Regulation of Metabolic and Signaling Pathways in human HF occurs independent of ischemic or non-ischemic etiology.** The net expression of a KEGG pathway (number of up- *minus* downregulated genes within a study in relation to total number of genes per given KEGG pathway), is color-coded with yellow and blue representing low and high expression of the pathway, respectively. The 160 different KEGG pathways were sorted according to their similarity to oxidative phosphorylation which is represented by the first row (labeled OXPPOS). KEGG pathways were analyzed in the two largest human myocardial microarray datasets available (GSE1145, lane #2 and GSE5406, lane #3 in Figure 2. See also Supplemental Table 1).

Supplemental Figure 3

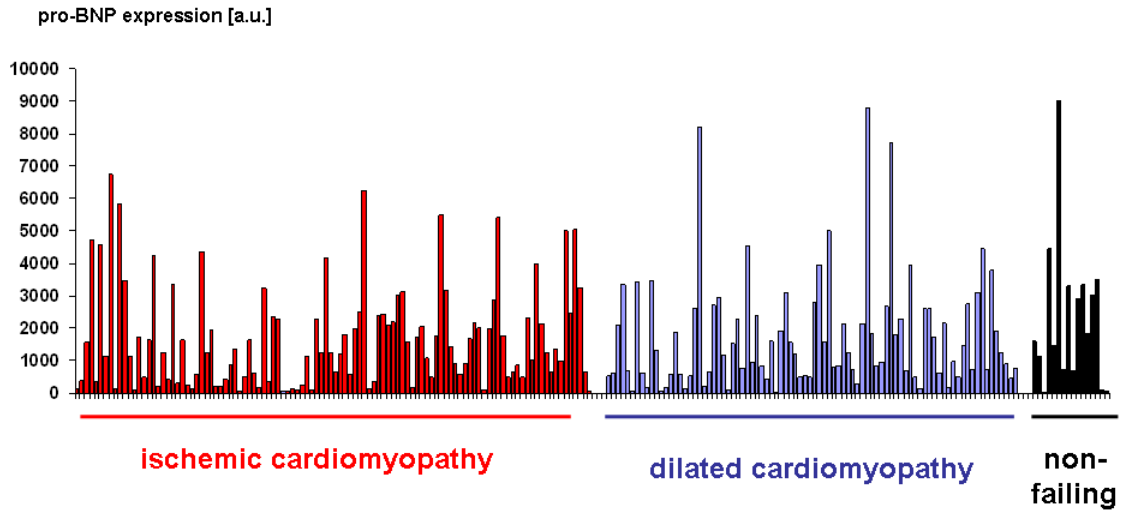

**Supplemental Figure 3. Variability of pro-BNP expression in human HF across 210 failing and non-failing myocardial samples (GSE5406, dataset #3).** Notably, the highest pro-BNP values (represented by a single probe set, 206801\_at) were found in the non-failing myocardial samples.

Supplemental Figure 4

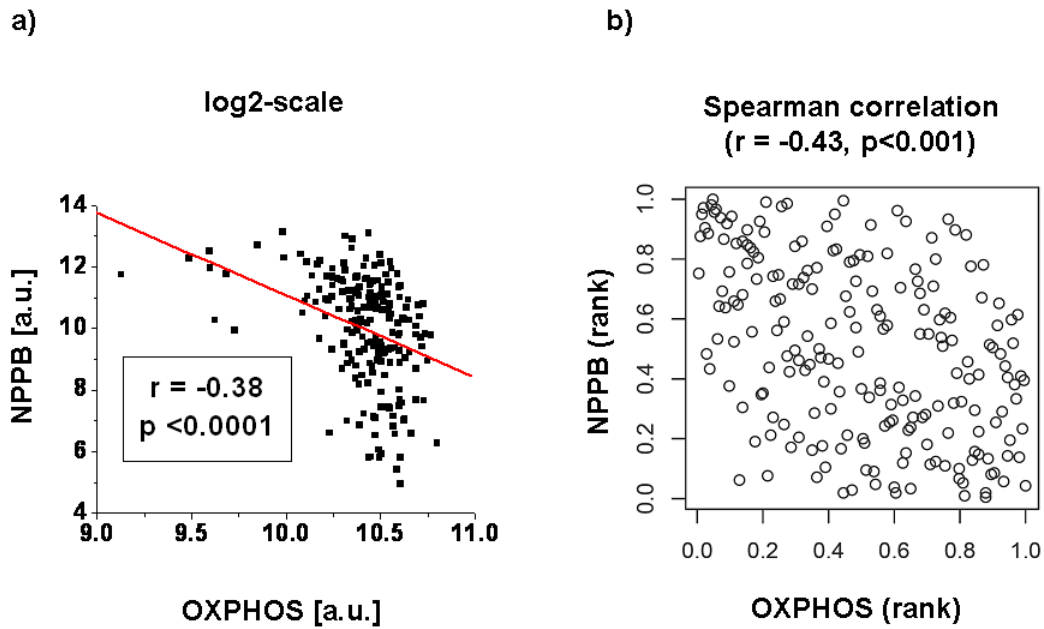

**Supplemental Figure 4. Expression of OXPBOS and pro-BNP (NPPB) were inversely correlated.** The left panel (A) shows the log<sub>2</sub> values for OXPBOS and NPPB. As the relation is not linear and to exclude that the correlation is inflated by a few outliers in OXPBOS, we have also performed a Spearman correlation shown in the right panel (B). This measure is the same no matter what monotone transformation one makes to the variables. Additionally, the correlation of ranks is robust to outliers, as it uses the ranks rather than the actual values.

Supplemental Figure 5

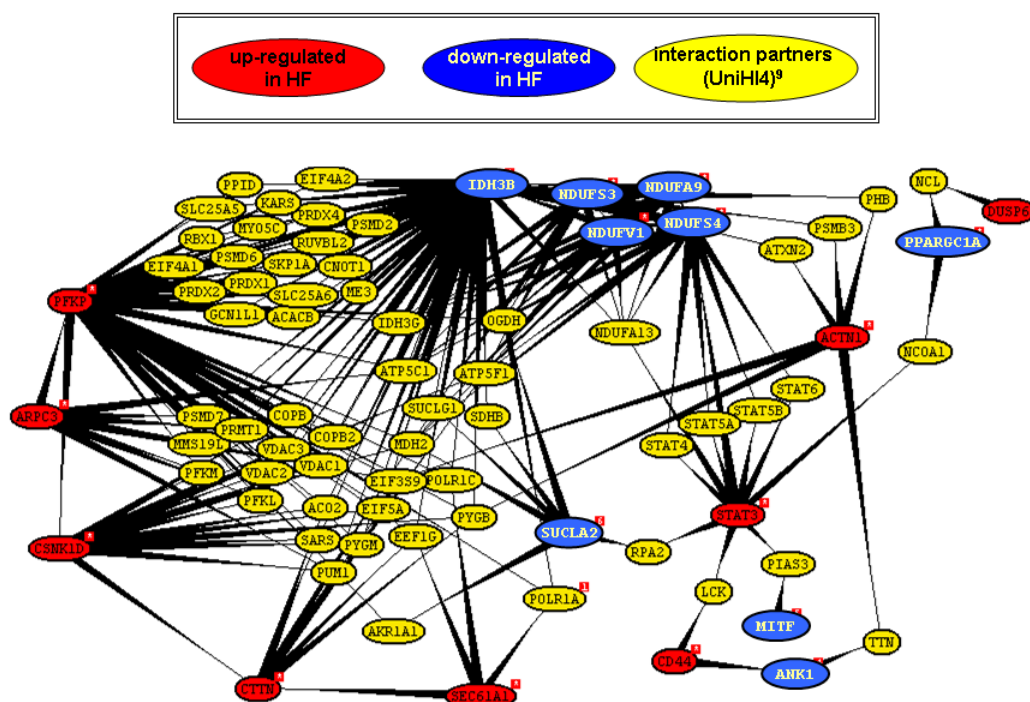

**Supplemental Figure 5. Graphical representations of protein interactions.** A query was conducted with 90 transcripts consistently regulated in HF (listed in Supplemental Table 3) using the Unified Human Interactome database (UniHI4)<sup>1</sup>. Interacting partners of the list of query proteins are displayed if they have an expression in heart tissue of more than 1000 units (expression summaries for 44,775 transcripts were derived utilizing the MAS5 algorithm by Affymetrix).<sup>22</sup> The display was restricted to direct interactions (yellow proteins) between query proteins (red and blue for up- and downregulated transcripts, respectively). Network analysis revealed that 18 out of 90 transcripts formed a network with multiple interconnected nodes (hubs) between up- and downregulated genes. Importantly, many of the predicted interaction partners, were also part of the common HF genes listed in Supplemental Table 3.

**Supplemental References:**

1. Chaurasia G, Malhotra S, Russ J, Schnoegl S, Hanig C, Wanker EE, Futschik ME. UniHI 4: new tools for query, analysis and visualization of the human protein-protein interactome. *Nucleic Acids Res.* 2009;37:D657-660.
